# Supplementary material
Source: PubMed Central journal article supplement (PMC2880847)
Supplement: Stam_et_al_OS1.pdf [file Stam_et_al_OS1.pdf]

## Online Supplement 1: Misplaced *rbcL* accessions and upgrade to NCBI taxonomy tree

There are a number of *rbcL* sequences stored in gene banks (NCBI GenBank, DDBJ database, EMBL nucleotide database) that are erroneously placed in the NCBI taxonomy tree according to the accepted systematic frameworks such as APG II. A full list of such mislabeled accessions is provided in the following. These types of sequence misidentification and misplacement can seriously bias BS and ML inferences on comprehensive datasets if they remain undetected. However, they affect GRTS-based results to a lesser degree.

*Comprehensive BS and ML analyses* – Using all available *rbcL* data and a taxon-naming scheme that encodes the systematic affiliation, misplaced sequences could be identified directly from the resulting trees. Mislabeled sequences that belonged to a different group (e.g., a Fagales-like *rbcL* stored as a Rosales taxon) were nested within the ‘correct’ clade, i.e., Fagales for the given example. Taxa that corresponded to outgroup-type *rbcL* (e.g., an asterid *rbcL* erroneously labeled as Rosales) were not grouped with any other accession or other mislabeled sequences: Each of the best ML trees based on the four comprehensive matrices contained a moderately to highly supported ‘junk’ clade (e.g. “eurosoid junk clade” in Text-fig. 3). In these cases the *CA-BS* support can also be interpreted as support for the monophyly of the ingroup.

*GRTS analyses* – Based on our data, the effect of most erraneous (misplaced in the *CA-BS* trees) *rbcL* sequences is alleviated by numerous valid (grouped according to their pre-defined groups in the comprehensive ML trees) *rbcL* sequences, because each of the 100 *GRTS-ML* or 10 *GRTS-BS* matrices contains different sets of randomly selected representative taxa of the predefined groups. Naturally, a negative effect can only be observed if the proportion of “wrong” sequences compared to “correct” ones is comparatively high, i.e., if the probability of “wrong” sequences being sampled in GRTS-replicates increases. Thus, the reliability of our method for identification of mislabeled taxa is limited by the size of the original data basis. Thus, the more sequences are available for a group of interest (a TU), the lower the impact of taxonomic (misidentified source), contaminant, or systematic (misplaced source) error. This is encouraging, because it might allow for automated definition of TUs for GRTS, by directly incorporating the lineage information provided in the NCBI GenBank files, rather than the visual inspection of each subalignment and manual identification of aberrant sequences as performed here. In the case of angiosperms, the NCBI taxonomy tree included c. 20 genera with different systematic affiliation (family, order) at the time of download than proposed by APG II, APW, and the *rbcL* phylogeny.

In addition to misplaced sequences, there are some inconsistencies between the NCBI tree at the time of download and the systematic resources (APG II; APW and references given there):

| NCBI Taxonomy Tree needing revision                                                                  | According NCBI taxonomy tree                                 | According APG II (order, family level)/APW/rbcL data (considering order, family, and genus) |
|------------------------------------------------------------------------------------------------------|--------------------------------------------------------------|---------------------------------------------------------------------------------------------|
| <i>Drypetes</i> spp., <i>Sibangea</i> spp. ( <i>Lingelshemia</i> , <i>Putranjiva</i> , no rbcL data) | Malpighiales; Phyllanthaceae; Drypeteae p.p.                 | Malpighiales; Putranjivaceae                                                                |
| <i>Limeum</i> spp.                                                                                   | Caryophyllales; Molluginaceae                                | Caryophyllales; Limeaceae                                                                   |
| <i>Harungana madagascariensis</i> [198768 AF518396]                                                  | Malpighiales; Clusiaceae                                     | Malpighiales; Hypericaceae                                                                  |
| <i>Vismia baccifera</i> [198795 AF518382]                                                            |                                                              |                                                                                             |
| <i>Hypericum perforatum</i> [65561 AF206779]                                                         |                                                              |                                                                                             |
| <i>Cratoxylum formosum</i> [198761 AF518395]                                                         |                                                              |                                                                                             |
| <i>Paradrypetes subintegrifolia</i> [314339 AY788184]                                                | Malpighiales; Phyllanthaceae; Drypeteae                      | Malpighiales; Rhizophoraceae                                                                |
| <i>Centroplassis glaucinus</i> [289629 AY663646]                                                     | Malpighiales; Phyllanthaceae; Phyllanthaceae <i>incertae</i> | Malpighiales; Malpighiales <i>incertae sedis</i> [monotypic]                                |
| <i>Desbordesia glaucescens</i> [300981 AY663631]                                                     | Sapindales; Simaroubaceae                                    | Malpighiales; Irvingiaceae                                                                  |
| <i>Irvingia malayana</i> [85215 AF123278/AF206782]                                                   |                                                              |                                                                                             |
| <i>Klainedoxa gabonensis</i> [289639 AY663630]                                                       |                                                              |                                                                                             |
| <i>Liquidamber</i> spp.                                                                              | Saxifragales; Hamamelidaceae                                 | Saxifragales; Altingiaceae                                                                  |
| <i>Perrottetia</i> spp.                                                                              | Celastrales; Celastraceae                                    | Huerteales <i>incertae sedis</i>                                                            |
| <i>Aphloia theiformis</i> [112806 AF206735]                                                          | rosids; Aphloiaceae [unplaced family]                        | Crossosomatales; Aphloiaceae                                                                |
| <i>Geissoloma marginatum</i> [39019 X83990]                                                          | rosids; Geissolomataceae [unplaced family]                   | Crossosomatales; Geissolomataceae                                                           |
| <i>Ixerba brexioides</i> [85557 AF084475]                                                            | rosids; Ixerbaceae [unplaced family]                         | Crossosomatales; Ixerbaceae                                                                 |
| <i>Strasburgeria robusta</i> [125056 AJ403007]                                                       | rosids; Strasburgeriaceae [unplaced family]                  | Crossosomatales; Strasburgeriaceae                                                          |

| New label      | Taxon                                                            | Published in                           | According TaxonomyTree            | According APW/AF                          | According <i>rbcL</i> (rosids and eudicots tree)                                                                                                                                                                                                                                                                                                                                                                                                                                                   |
|----------------|------------------------------------------------------------------|----------------------------------------|-----------------------------------|-------------------------------------------|----------------------------------------------------------------------------------------------------------------------------------------------------------------------------------------------------------------------------------------------------------------------------------------------------------------------------------------------------------------------------------------------------------------------------------------------------------------------------------------------------|
| OxaOx_L14692   | <i>Averrhoa carambola</i>                                        | Price & Palmer, Ann MO Bot Gard, 1993  | Oxalidales; Oxalidaceae           | same                                      | Identical to <i>Wendtia gracilis</i> L14708 (Geraniales; Ledocarpaceae)                                                                                                                                                                                                                                                                                                                                                                                                                            |
| CanRo_AF062004 | <i>Trema micrantha</i>                                           | Qiu et al., IJPS, 1998                 | Rosales; Ulmaceae                 | Rosales; Cannabaceae                      | Identical to <i>Leitneria floridana</i> AF062003 (Sapindales; Simaroubaceae)                                                                                                                                                                                                                                                                                                                                                                                                                       |
| PapFb_AY904389 | <i>Andira aubletii</i>                                           | Haston et al., AJB, 2005               | Fabales; Fabaceae; Papilionoideae | same                                      | Connaraceae (Oxalidales); highly similar (99%) to <i>Conarus conchocarpus</i> U06798                                                                                                                                                                                                                                                                                                                                                                                                               |
| MyrFa_L01934   | <i>Morella</i> [" <i>Myrica</i> "] <i>cerifera</i>               | Albert et al., Science, 1992           | Fagales; Myricaceae               | same                                      | Cannabaceae (Rosales); highly similar (99%) to <i>Celtis sinensis</i> D86309                                                                                                                                                                                                                                                                                                                                                                                                                       |
| JugFa_AY147094 | <i>Cyclocarya paliurus</i>                                       | Li et al., 2004?                       | Fagales; Juglandaceae             | same                                      | Sapindales, as sister to Simaroubaceae; most similar (97%) to <i>Leitneria</i> , <i>Ailanthus</i> and others                                                                                                                                                                                                                                                                                                                                                                                       |
| MorRo_L01933   | <i>Morus alba</i>                                                | Soltis et al., PNAS, 1990              | Rosales; Moraceae                 | same                                      | Nested among <i>Prunus</i> accessions (Rosales; Rosaceae)                                                                                                                                                                                                                                                                                                                                                                                                                                          |
| MorRo_AJ390066 | <i>Dorstenia psilurus</i>                                        | Richardson et al., AJB, 2000           | Rosales; Moraceae                 | same                                      | Placed within one of the Rhamnaceae subclades including <i>Emmenosperma</i> , <i>Colubrina</i> , among others (97% identity)                                                                                                                                                                                                                                                                                                                                                                       |
| CanRo_L12638   | <i>Celtis yunnanensis</i>                                        | Qiu et al., Ann MO Bot Gard 1993       | Rosales; Ulmaceae                 | Rosales; Cannabaceae                      | Nested among <i>Morella</i> accessions (Fagales; Myricaceae)                                                                                                                                                                                                                                                                                                                                                                                                                                       |
| CanRo_AY263941 | <i>Celtis philippensis</i>                                       | Li et al., 2004?                       | Rosales; Ulmaceae                 | Rosales; Cannabaceae                      | Placed between <i>Ulmus</i> and <i>Zelkova</i> (Rosales; Ulmaceae s.str.); 98% identity                                                                                                                                                                                                                                                                                                                                                                                                            |
| BonMa_AJ402990 | <i>Ploiariium sp.</i> Cameron s.n.                               | Savolainen et al., 2000                | Malpighiales; Bonnetiaceae        | same                                      | Thymelaeaceae (Malvales); next to <i>Daphne</i> (96%), <i>Thymelaea</i> (97% identity), and others                                                                                                                                                                                                                                                                                                                                                                                                 |
| SalMa_AY757086 | <i>Gerrardina foliosa</i>                                        | Alford, 2006                           | Malpighiales; Salicaceae          | Huerteales; Gerradinaceae [APW, Mai 2007] | Sister to <i>Petenaee cordata</i> AJ233158, forming an isolated eurosid 2 clade; sequence most similar to some Huerteales (97% identity)                                                                                                                                                                                                                                                                                                                                                           |
| CapBr_AY483279 | <i>Tirania purpurea</i>                                          | Hall et al., Syst Bot, 2004            | Brassicales; Capparaceae          | same                                      | Resedaceae                                                                                                                                                                                                                                                                                                                                                                                                                                                                                         |
| BraBr_X73284   | <i>Sinapsis alba</i>                                             | Capesius, unpublished [2004]           | Brassicales; Brassicaceae         | same                                      | Papilionoideae (Fabales; Fabaceae)                                                                                                                                                                                                                                                                                                                                                                                                                                                                 |
| EmbBr_AJ402949 | <i>Emblingia calceoliflora</i>                                   | Savolainen et al., Kew Bull, 2000      | Brassicales; Emblingiaceae        | same                                      | Not a rosid, but an asterid <i>rbcL</i> ; forms a clade with misplaced <i>Sinopodophyllum hexandrum</i> (AF203487) and <i>Getonia</i> [" <i>Calycopteris</i> "] <i>floribunda</i> (AF281478), as sister clade to asterid clades included; sequence most similar to asterids (lamiids) <i>Gentiana</i> (L14398) and <i>Gentianella</i> (Y11862) (Gentianales; Gentianaceae) and <i>Hedyosmum</i> (AF121364; <i>Chloranthales</i> ; <i>Chloranthaceae</i> ), latter a putative misnamer or misplacer |
| SapSp_AJ402931 | <i>Botteogoa insignis</i>                                        | Savolainen et al., Kew Bull, 2000      | Sapindales; Sapindaceae           | same                                      | Rutaceae; grouped with <i>Ptaeroxylon obliquum</i> (AF123276; 97%) and <i>Cneorum pulverulentum</i> (AF206752; 98% identity)                                                                                                                                                                                                                                                                                                                                                                       |
| SapSp_AY510146 | <i>Brucea javanica</i>                                           | Lee et al., local Korean journal, 2004 | Sapindales; Simaroubaceae         | same                                      | Anacardiaceae; grouped with <i>Rhus</i> , <i>Toxicentron</i> , and others (99% identity)                                                                                                                                                                                                                                                                                                                                                                                                           |
| NitSp_DQ267159 | <i>Nitraria sphaerocarpa</i>                                     | Zhang et al., unpublished [2006]       | Sapindales; Nitrariaceae          | same                                      | Peganaceae-subclade (Sapindales; same family according APG II); sequence identity with other Peg'ceae 99-100%                                                                                                                                                                                                                                                                                                                                                                                      |
| ComMy_AF281478 | <i>Calycopteris</i> [ <i>Getonia</i> ] <i>floribunda</i>         | Tan et al., unpublished [2001]         | Myrtales; Combretaceae            | same                                      | not a rosid, groups with asterids (see <i>Emblingia calceoliflora</i> AJ402949 above); sequence most similar to asterids (lamiids) <i>Teucrium</i> (U78715; 97%) and <i>Teucrium</i> (L14411; 97%)                                                                                                                                                                                                                                                                                                 |
| ComMy_AF281477 | <i>Conocarpus erectus</i>                                        | Tan et al., unpublished [2001]         | Myrtales; Combretaceae            | same                                      | Malvaceae (Malvales); grouped with <i>Conocarpus</i> (AF281477), <i>Hermannia</i> (AJ233130), and <i>Lavatera</i> (AJ233122; 97% sequence similarity)                                                                                                                                                                                                                                                                                                                                              |
| OnaMy_AY841634 | <i>Mkilua fragrans</i>                                           | Chatrou et al., unpublished [2005]     | Myrtales; Onagraceae              | Magnoliales; Annonaceae                   | apparently not an eudicot (member of "junk clade"); most similar (98%) to Annonaceae <i>Cymbopetalum</i> (AY743442) and <i>Trigynaea</i> (AY841660)                                                                                                                                                                                                                                                                                                                                                |
| AizCa_AJ235778 | <i>Delosperma echinatum</i>                                      | Savolainen et al., Syst Biol, 2000     | Caryophyllales; Aizoaceae         | same                                      | within Nyctaginaceae-Sarcobataceae-Phytolaccaceae clade, grouped with <i>Phytolacca</i> (DQ006112; M62567; 98% identity)                                                                                                                                                                                                                                                                                                                                                                           |
| PgnCa_M77702   | <i>Rheum x hybridum</i>                                          | Giannasi et al., Syst. Bot., 1992      | Caryophyllales; Polygonaceae      | same                                      | Plumbaginaceae, virtually identical (100%, shorter sequence) to <i>Plumbago</i> (Y16905, Y16906, 100%), both grouped with <i>Dyerophytum</i> (AJ312253, 98% identity)                                                                                                                                                                                                                                                                                                                              |
| EbeEr_AJ402968 | <i>Lissocarpa benthamii</i>                                      | Savolainen et al., Kew Bull, 2000      | Ericales; Ebenaceae               | same                                      | Rutaceae (Sapindales), in a subclade including <i>Pleiospermium</i> (AF066821, 95% identity), <i>Clausena</i> (AF066813, 94%), <i>Severinia</i> (AF066806, 94%), and others                                                                                                                                                                                                                                                                                                                        |
| TstEr_AY380342 | <i>Archytaea multiflora</i>                                      | Davis & Chase, AJB, 2004               | Ericales; Ternstroemiaceae        | Malpighiales; Bonnetiaceae                | placed as sister taxon to <i>Bonnetia</i> (96% identity); most similar (97%) to Clusiaceae <i>Mesua</i> (AY625024), <i>Poeciloneuron</i> (AY625023), and <i>Calophyllum</i> (Z75672)                                                                                                                                                                                                                                                                                                               |
| MsnEr_L12598   | <i>Ardisia crenata</i>                                           | Kron & Chase, Ann MO Bot Gard, 1993    | Ericales; Myrsinaceae             | same                                      | Ericaceae, in a subclade including <i>Arbutus</i> (AF419813, L12597; 97% identity); <i>Arctostaphylos</i> (AF419814, 95%), and <i>Comarostaphylis</i> (AF419819, 96%)                                                                                                                                                                                                                                                                                                                              |
| PplEr_AJ402986 | <i>Pentaphylax euryoides</i>                                     | Savolainen et al., Kew Bull, 2000      | Ericales; Pentaphylacaceae        | same                                      | member of "eudicot junk clade"; most similar (98%) to Orchidaceae (Aspergales) such as <i>Megastylis</i> (AY381125) and <i>Chiloglottis</i> (AF074124), among others                                                                                                                                                                                                                                                                                                                               |
| PplEr_AJ428891 | <i>Pentaphylax euryoides</i>                                     | Bremer et al., MPE, 2002               | Ericales; Pentaphylacaceae        | same                                      | exact duplicate of <i>Pelliciera rhizophorae</i> (AJ428893, same authors)                                                                                                                                                                                                                                                                                                                                                                                                                          |
| GroSf_AF299092 | <i>Quintinia verdonis</i>                                        | Xiang & Soltis, unpublished [2000]     | Saxifragales; Grossulariaceae     | euasterid II                              | grouped with asterid clades included; most similar (97%) to <i>Linconia</i> (AY490993; Bruniaceae), <i>Pennantia</i> (AJ494842, AJ494843; Apiales; Pennantiaceae), <i>Viburnum</i> (X87398; [Sphenostemonaceae])                                                                                                                                                                                                                                                                                   |
| GroSf_X87394   | <i>Quintinia verdonis</i>                                        | Gustafsson et al., PSE, 1996           | Saxifragales; Grossulariaceae     | Quintiniaceae                             | Dipsacales; Adoxaceae and other campanulids                                                                                                                                                                                                                                                                                                                                                                                                                                                        |
| SaxSf_AF206766 | <i>Fendlera rupicola</i>                                         | Soltis et al., unpublished [2003]?     | Saxifragales; Saxifragaceae       | Cornales; Hydrangaceae                    | Hydrangaceae; sister to <i>Jamesia americana</i> (AF323201, 98% identity)                                                                                                                                                                                                                                                                                                                                                                                                                          |
| PdsSf_AJ403018 | <i>Whittonia guanensis</i>                                       | Savolainen et al., Kew Bull, 2000      | Saxifragales; Peridiscaceae       | same                                      | Malpighiales, as sister taxon to Malpighiaceae clade; most similar (97%) to various Malpighiaceae                                                                                                                                                                                                                                                                                                                                                                                                  |
| CelCe_AY935723 | <i>Bhesa robusta</i>                                             | Zhang & Simmons, Syst Bot, 2006        | Celastrales; Celastraceae         | Malpighiales <i>incertae sedis</i>        | Malpighiales, forming a subclade of ambiguous systematic position; most similar (96%) to <i>Vantanea</i> (Z75679; Humiriaceae), <i>Philyra</i> (AY794920; Euphorbiaceae), <i>Lindackeria</i> , and <i>Kiggelaria</i> (AJ418800, AY788180; member of "eudicot junk clade"; most similar to Calycanthaceae (Laurales) such as <i>Calycanthus floridus</i> var. <i>glauca</i> (AJ428413; 94%), <i>Idiospermum</i> (L12651; 93%), and <i>Chimonanthus</i> (L12639; 93%)                                |
| CelCe_AY935722 | <i>Bhesa paniculata</i>                                          | Zhang & Simmons, Syst Bot, 2006        | Celastrales; Celastraceae         | same                                      | member of "eudicot junk clade"; most similar to <i>Taxodium distichum</i> AF119185 (same author!; Coniferales: Cupressaceae)                                                                                                                                                                                                                                                                                                                                                                       |
| CelCe_AY935740 | <i>Stackhousia monogyne</i>                                      | Zhang & Simmons, Syst Bot, 2006        | Celastrales; Celastraceae         | same                                      | member of "eudicot junk clade"; most similar to <i>Taxodium distichum</i> AF119185 (same author!; Coniferales: Cupressaceae)                                                                                                                                                                                                                                                                                                                                                                       |
| NysCo_AF119178 | <i>Nyssa sylvatica</i>                                           | Wang & Lincoln, unpublished? [2000]    | Cornales; Nyssaceae               | same                                      | Huerteales, grouped with <i>Tapiscia</i> (Tapiscaceae; 98% identity)                                                                                                                                                                                                                                                                                                                                                                                                                               |
| StaCs_AY646109 | <i>Huetea glandulosa</i>                                         | Simmons & Simpson, unpublished? [2005] | Crossosomatales; Staphyleaceae    | Huerteales; Tapisciaceae                  | sister to <i>Gerrardina foliosa</i> AY757086, forming an isolated eurosid 2 subclade; sequence most similar to some Huerteales (95% identity)                                                                                                                                                                                                                                                                                                                                                      |
| PetMv_AJ233158 | <i>Petenaee cordata</i>                                          | Bayer et al., BotJLS, 1999             | Oxalidales; Elaeocarpaceae        | Malvales <i>incertae sedis</i>            | identical to <i>Trochodendron aralioides</i> (L01958)                                                                                                                                                                                                                                                                                                                                                                                                                                              |
| EicOx_AJ233158 | <i>Petenaee cordata</i>                                          | Bayer et al., BotJLS, 1999             | Oxalidales; Elaeocarpaceae        | Malvales <i>incertae sedis</i>            | identical to <i>Trochodendron aralioides</i> (L01958)                                                                                                                                                                                                                                                                                                                                                                                                                                              |
| PlaPr_L01943   | <i>Platanus occidentalis</i>                                     | Albert et al., Science, 1992           | Proteales; Platanaceae            | same                                      | identical to <i>Trochodendron aralioides</i> (L01958)                                                                                                                                                                                                                                                                                                                                                                                                                                              |
| BerRa_AF203487 | <i>Sinopodophyllum</i> [" <i>Podophyllum</i> "] <i>hexandrum</i> | Xiang et al., unpublished? [2003]      | Ranunculales; Berberidaceae       | same                                      | not a basal eudicot, but an asterid (see <i>Emblingia calceoliflora</i> AJ402949 above); most similar (98%) to the lamiid <i>Campsis radicans</i> (several accessions; Lamiales; Bignoniaceae)                                                                                                                                                                                                                                                                                                     |
| RanRa_AF093729 | <i>Placospermum coriaceum</i>                                    | Hoot et al., Ann MO Bot Gar, 1999      | Ranunculales; Ranunculaceae       | Proteales; Proteaceae                     | Proteaceae, sister taxon of <i>Persoonia lanceolata</i> U79178 (97% identity)                                                                                                                                                                                                                                                                                                                                                                                                                      |
| ZygZy_DQ267165 | <i>Tribulus terrestris</i>                                       | Zhang et al., unpublished [2006]       | Zygophyllales; Zygophyllaceae     | Zygophyllales; Zygophyllaceae             | Peganaceae (Sapindales); highly similar (99%) to <i>Malacocarpus</i> (U39280) and <i>Peganum</i> (DQ267164)                                                                                                                                                                                                                                                                                                                                                                                        |
| ZygZy_DQ267163 | <i>Tetraena mongolica</i>                                        | Zhang et al., unpublished [2006]       | Zygophyllales; Zygophyllaceae     | Zygophyllales; Zygophyllaceae             | <i>Nitraria</i> (Sapindales; Nitrariaceae s.str.; 99% identity)                                                                                                                                                                                                                                                                                                                                                                                                                                    |
