# Supplementary material
Source: PubMed Central journal article supplement (PMC2880847)
Supplement: Stam_et_al_OS2.pdf [file Stam_et_al_OS2.pdf]

## Online Supplement 2: Details of the results of comprehensive ML analyses

As in an earlier analysis based on *rbcL* data,<sup>1</sup> for the most nodes in the backbone were poorly supported: However, commonly accepted clades such as the eurosids 1, eurosids 2 (ROSID and EUDIS matrices), rosids, core eudicots, and Proteales (EUDIS) were present in the best-known ML trees, albeit with low support (see main text; Table S1). Phylogenetic signals that support these higher (or deeper) relationships may be weak in *rbcL* data but exist nonetheless.<sup>1</sup> They are found in the best-scoring ML trees (this study; see also the *rbcL* tree by Savolainen et al.<sup>1</sup>) and receive *CA-BS* >>0, ranging between 20 and 50 (a detailed list is given as addendum in this Online Supplement). Accordingly, *rbcL* data has been used in all multigene analysis published to date, e.g.,<sup>1-6</sup> and is considered to be compatible with other genes in contrast to, for instance, the nuclear encoded 25S ribosomal DNA<sup>7</sup> (see Wilkinson<sup>8</sup> for a more general view on this topic).

Relationships supported by *rbcL* data can be generally incongruent to multigene analyses, or the multigene-based relationship is only one alternative based on the *rbcL* data. For instance, within the Cucurbitales the Anisophylleaceae are supported as sister to the Cucurbitaceae based on the ROSID and EUDIS matrices. This is in agreement with Savolainen et al.<sup>1</sup> but in contrast to the ML and BS analyses based on the EURO1 matrix and a recent multigene analysis.<sup>9</sup> Vice versa, a *Begonia-Datisca*-Tetramelaceae clade, which received maximum support from the study of Zhang et al.,<sup>9</sup> is not recognized based on the EURO1 matrix but found in the ML trees based on the two larger matrices (ROSID, EUDIS) with low, nevertheless stable support ( $BS_{EURO2/ROSID/EUDIS} = 49/47/45$ ). Varying support can be found in other cases, e.g. a clade comprising the Celastrales, a monophyletic order according to APG II (2002), is better supported based on the EURO1 matrix than the ROSID and EUDIS matrices ( $CA-BS_{EURO1} = 81$  vs.  $CA-BS_{ROSID/EUDIS} = 68/69$ ), whereas support of the Malvales clade increases ( $CA-BS_{EURO2/ROSID/EUDIS} = 81/86/92$ ) with matrix size and taxon coverage. Another interesting case is Betulaceae: In the ML trees based on matrices EURO1 and EUDIS they form a grade, but in the ROSID-based ML tree a clade. The respective phylogenetic split (Betulaceae|All other), however, receives moderate BS support from all three matrices ( $CA-BS_{EURO1/ROSID/EUDIS} = 63/65/55$ ).

The following families that have been defined as family-level TUs are not supported (>50) by *CA-BS*.

1. Among basal eudicots (EUDIS matrix only): *Nelumbo* (Proteales: monogeneric Nelumbaceae,  $GRTS-ML=100$ ), forming a grade in the best-known ML tree.
2. Among core eudicots other than rosids (EUDIS matrix only) Aizoaceae, Molluginaceae, Phytolaccaeae, and Portulacaceae (Caryophyllales), Cyrillaceae and Sladeniaceae (asterids: Ericales) as well as Hamamelidaceae (Saxifragales). These families neither formed clades in the ML tree (see Supplementary Material) nor were they supported by

*GRTS-ML*  $\geq 50$ , unlike the non-*CA-BS* supported Ternstroemiaceae (also Ericales; grade; *GRTS-ML* = 69) and Cornaceae (clade; *GRTS-ML* = 88), and Hydrangaceae (clade; *GRTS-ML*=64) of the Cornales (also asterids). [In the case of the Cornaceae the low *CA-BS* is due to *rbcL* accessions of *Mastixia*, placed as sister to Nyssaceae, the sister family of Cornaceae (“*Cornaceae* s.l.”; APG II, 2003; not supported by *rbcL*).]

3. Among eurosids I (matrices EUDIS, ROSID, EURO1) Celastraceae (Celastrales; grade; *GRTS-ML*<sub>EUDIS/ROSID</sub>=63/59); Achariaceae (EUDIS clade; *GRTS-ML*<sub>EUDIS/ROSID/EURO1</sub> = 72/68/61), Ochnaceae (clade or diphyletic; *GRTS-ML*<sub>EUDIS/ROSID/EURO1</sub> = 60/60/50), Passifloraceae (s.str.; grade; *GRTS-ML*<sub>EUDIS/ROSID</sub> = 61/54), Phyllanthaceae (Malpighiales; EUDIS clade; *GRTS-ML*<sub>EUDIS/ROSID/EURO1</sub>=72/62/69); Oxalidaceae (Oxalidales; grade; *GRTS-ML*<sub>All matrices</sub> < 20); Cannabaceae (clade; *GRTS-ML*<sub>EUDIS/ROSID</sub> = 63/60) and Rhamnaceae (grade or diphyletic; *GRTS-ML*<sub>EUDIS/ROSID</sub> = 61/54) of the Rosales;
4. Among eurosids II (matrices EUDIS, ROSID, EURO2): Salvadoraceae (Brassicales; grade, *GRTS-ML*<sub>All matrices</sub><50; a Batis–Salvadoraceae clade received *CA-BS*<sub>EURO1</sub> of 100; Dipterocarpaceae (s.str.; grade, *GRTS-ML*<sub>EUDIS/ROSID/EURO1</sub> = 100/77/78).

The following tables (Tables S1-S3) are summarizing *CA-BS*, *GRTS-BS*, and *GRTS-ML* support of important and commonly recognized clades, such as accepted orders (used as TUs in some *GRTS-BS* and *GRTS-ML* analyses). For comparison, Tables S1 and S2 also list support from selected literature; a detailed comprehensive list including all supported relationships and potential alternatives indicated by multigene analysis is given as addendum in this Online Supplement. Table S3 focuses on changing support induced by using different reduction factors in GRTS analysis (order-level TUs)

**Table S1.** CA-BS and GRTS-ML (family-level TU subsampling; reduction factor of 1/4) support values (2<sup>nd</sup> and 3<sup>rd</sup> column) of orders and order-level TU in comparison to published data. See Supplementary Material for more details.

|                |                   | CA-BS <sub>EURO1,2</sub> /<br>CA-BS <sub>EUDIS</sub> /<br>CA-BS <sub>ROSID</sub> <sup>a</sup> | GRTS <sub>EURO1,2</sub> /<br>GRTS <sub>ROSID</sub> /<br>GRTS <sub>EUDIS</sub> | RbcL <sup>b</sup> ,<br>JP (taxa<br>included) | 3-gene <sup>c</sup> ,<br>JP/PP |
|----------------|-------------------|-----------------------------------------------------------------------------------------------|-------------------------------------------------------------------------------|----------------------------------------------|--------------------------------|
| Basal eudicots | Buxales           | ~/~/81                                                                                        | ~/~/100                                                                       | 94                                           | 100/1.0                        |
|                | Proteales         | ~/~/<20                                                                                       | ~/~/<20                                                                       | <50                                          | 84/1.0                         |
|                | Ranunculales      | ~/~/88                                                                                        | ~/~/72                                                                        | 51                                           | 98/1.0                         |
|                | Sabiaceae         | ~/~/98                                                                                        | ~/~/100                                                                       | NA                                           | 100/1.0                        |
|                | Trochodendraceae  | ~/~/100                                                                                       | ~/~/100                                                                       | 100                                          | 100/1.0                        |
| Asterids       | Cornales          | ~/~/54                                                                                        | ~/~/46                                                                        | 52                                           | 98/1.0                         |
|                | Ericales          | ~/~/71                                                                                        | ~/~/60                                                                        | <50                                          | 98/1.0                         |
| Eurosids I     | Celastrales       | 81/68/69                                                                                      | 74/91/83                                                                      | 99                                           | 62/1.0                         |
|                | Cucurbitales      | 98/97/98                                                                                      | 100/100/100                                                                   | 87                                           | 100/1.0                        |
|                | Fabales           | 90/90/86                                                                                      | 99/92/93                                                                      | <50                                          | 100/1.0                        |
|                | Fagales           | 91/91/92                                                                                      | 58/64/67                                                                      | 94                                           | 100/1.0                        |
|                | Huaceae           | 100/100/100                                                                                   | 100/100/100                                                                   | NA                                           | Singleton                      |
|                | Malpighiales      | 82/88/86                                                                                      | 74/88/69                                                                      | <50                                          | 99/1.0                         |
|                | Oxalidales        | 81/91/89                                                                                      | <20/96/99                                                                     | 93                                           | 100/1.0                        |
|                | Rosales           | 92/90/93                                                                                      | 65/67/71                                                                      | <50                                          | 100/1.0                        |
|                | Zygophyllales     | 97/91/99                                                                                      | 84/90/91                                                                      | 76                                           | 100/1.0                        |
|                | Eurosids II       | Brassicales                                                                                   | 92/100/100                                                                    | 92/96/94                                     | 78                             |
| Huertales      |                   | 81/44/50                                                                                      | 100/71/73                                                                     | NA                                           | Singleton                      |
| Malvales       |                   | 81/86/92                                                                                      | 100/69/72                                                                     | <50                                          | 100/1.0                        |
| Sapindales     |                   | 98/100/87                                                                                     | 100/70/64                                                                     | <50                                          | 100/1.0                        |
| Other rosids   | Crossosomatales   | ~/<20/29                                                                                      | ~/<20/52                                                                      | 99                                           | 100/1.0                        |
|                | Geraniales        | ~/<20/22                                                                                      | ~/<20/22                                                                      | NA                                           | 80/1.0                         |
|                | Myrtales          | ~/98/100                                                                                      | ~/75/72                                                                       | 90                                           | 100/1.0                        |
|                | Picramminaceae    | ~/100/100                                                                                     | ~/100/100                                                                     | 100                                          | NA                             |
| Other eudicots | Berberidopsidales | ~/~/70                                                                                        | ~/~/100                                                                       | NA                                           | 100/1.0                        |
|                | Caryophyllales    | ~/~/93                                                                                        | ~/~/100                                                                       | 84                                           | 100/1.0                        |
|                | Dilleniaceae      | ~/~/99                                                                                        | ~/~/92                                                                        | 96                                           | 100/1.0                        |
|                | Gunnerales        | ~/~/88                                                                                        | ~/~/100                                                                       | 57                                           | 75/1.0                         |
|                | Santalales        | ~/~/64                                                                                        | ~/~/100                                                                       | <50                                          | 100/1.0                        |
|                | Saxifragales      | ~/~/37                                                                                        | ~/~/31                                                                        | <50                                          | 98/1.0                         |
|                | Vitaceae          | ~/~/100                                                                                       | ~/~/100                                                                       | 86                                           | 100/1.0                        |

<sup>a</sup> Misplaced or controversial accessions not considered. <sup>b</sup> Savolainen et al.<sup>1</sup>

<sup>c</sup> Soltis et al.<sup>3,6</sup>

**Table S2.** CA-BS and GRTS-ML (see Table 5) support values (2<sup>nd</sup> and 3<sup>rd</sup> column) of selected backbone nodes in comparison to published data. Abbreviations, first row: JP, parsimony Jackknife percentages; pBV, parsimony BV; PP, Bayesian posterior probabilities; subsequent rows: NA, not available; Cel., Celastrales; Huac., Huaceae; Mal., Malpighiales; Oxal., Oxalidales.

| Clade (sensu APG II) defined by node | This study                                                                       |                                                                               | <i>rbcL</i> JP <sup>a</sup> | Published data            |                                  |
|--------------------------------------|----------------------------------------------------------------------------------|-------------------------------------------------------------------------------|-----------------------------|---------------------------|----------------------------------|
|                                      | CA-BS <sub>EURO1,2</sub> /<br>CA-BS <sub>ROSID</sub> /<br>CA-BS <sub>EUDIS</sub> | GRTS <sub>EURO1,2</sub> /<br>GRTS <sub>ROSID</sub> /<br>GRTS <sub>EUDIS</sub> |                             | 3-gene JP/PP <sup>b</sup> | Multigene <sup>c</sup> BV/pBV/PP |
| Core eudicots                        | ~/~/<20                                                                          | ~/~/<20                                                                       | <50                         | 100/1.0                   | 100/100/1.0                      |
| Rosids                               | ~/~/32                                                                           | ~/~/46                                                                        | <50                         | 99/1.0                    | 100/86/1.0                       |
| Eurosids I                           | ~/37/47                                                                          | ~/63/48                                                                       | <50                         | 77/1.0                    | 100/79/1.0                       |
| Cel.-Mal.-Huac.-Oxal.                | 54/23/32                                                                         | 60/92/76                                                                      | <50                         | 51/1.0                    | NA                               |
| Cel. sister to Mal.                  | <20/<20/<20                                                                      | <20/87/75                                                                     | No                          | <50/0.54                  | NA                               |
| Huac. sister to Oxal.                | <20/<20/<20                                                                      | <20/62/68                                                                     | No                          | NA/0.68                   | NA                               |
| Nitrogen fixing clade                | 54/54/54                                                                         | 60/70/66                                                                      | <50                         | 68/1.0                    | 100/99/1.0                       |
| Fabales sister to others             | 54/57/70                                                                         | 61/74/72                                                                      | <50                         | <50/0.78                  | No                               |
| Eurosids II                          | ~/49/43                                                                          | ~/35/27                                                                       | <50                         | 95/1.0                    | 100/68/1.0                       |
| Malvales sister to Sapindales        | 77/33/35                                                                         | 100/61/37                                                                     | No                          | 51/1.0                    | No                               |
| Asterids                             | ~/~/38                                                                           | ~/~/<20                                                                       | <50                         | 99/1.0                    | 100/100/1.0                      |

<sup>a</sup> Savolainen et al.<sup>1</sup>

<sup>b</sup> Soltis et al.<sup>3,6</sup>

<sup>c</sup> Jansen et al.,<sup>10</sup> not all TU (orders, ungrouped families and genera) represented.

**Table S3.** Comparison between *GRTS-ML* and *GRTS-BS* (ROSID matrix, reduction factor of 1/16 and 1/64, *GRTS-BS* only, order-level TU)

|                                | <i>GRTS-ML</i> | <i>GRTS-BS</i> | <i>GRTS-BS</i> | <i>CA-BS</i> |
|--------------------------------|----------------|----------------|----------------|--------------|
|                                | 1/16           | 1/16           | 1/64           |              |
| Eurosid I clade                | 62             | 67             | 55             | 37           |
| Zygophyllales sister to rest   | 66             | 42             | 23             | 37           |
| CHMO clade                     | 85             | 40             | <20            | 23           |
| Celastrales grouped            | 57             | 69             | ~              | 68           |
| Huaceae grouped                | 100            | 100            | ~              | 100          |
| Malpighiales grouped           | 57             | 60             | 69             | 88           |
| Oxidales grouped               | 100            | 98             | ~              | 91           |
| Nitrogen-fixing clade          | 64             | 37             | 22             | 54           |
| Fabales sister to rest         | 91             | 50             | 26             | 57           |
| Fabales grouped                | 90             | 97             | 97             | 90           |
| Cucurbitales sister to Fagales | 61             | 36             | 22             | 36           |
| Fagales sister to Rosales      | <20            | 24             | <20            | 21           |
| Cucurbitales grouped           | 99             | 98             | ~              | 97           |
| Fagales grouped                | 87             | 81             | 88             | 91           |
| Rosales grouped                | 89             | 78             | 75             | 90           |
| Eurosid II clade               | <20            | <20            | <20            | 49           |
| Malvales sister to Sapindales  | 44             | 26             | 37             | 33           |
| Brassicales                    | 84             | 85             | ~              | 100          |
| Huerteales                     | 39             | 42             | ~              | 44           |
| Malvales                       | 96             | 74             | 82             | 86           |
| Sapindales                     | 83             | 96             | 99             | 100          |

## References

1. Savolainen V, Chase MW, Hoot SB, et al. (10 co-authors). Phylogenetics of flowering plants based on combined analysis of plastid *atpB* and *rbcL* gene sequences. *Syst. Biol.* **2000**; 49:306-362.
2. Qiu YL, Lee JH, Bernasconi-Quadroni F, et al. (10 co-authors). The earliest angiosperms: evidence from mitochondrial, plastid and nuclear genomes. *Nature.* 1999; 402:404-407.
3. Soltis DE, Soltis PS, Chase MW, et al. (16 co-authors). 2000. Angiosperm phylogeny inferred from 18S rDNA, *rbcL*, and *atpB* sequences. *Bot. J. Linn. Soc.* 133:381-461.
4. Soltis DE, Soltis PS, Zanis MJ. 2002. Phylogeny of seed plants based on evidence from eight genes. *Am. J. Bot.* **89**: 1670-1681.
5. Soltis DE, Senter AE, Zanis MJ, et al. (9 co-authors). Gunnerales are sister to other core eudicots: Implications for the evolution of pentamery. *Am. J. Bot.* **2003**; 90:461-470.
6. Soltis DE, Gitzendanner MA, Soltis PS. A 567-taxon data set for angiosperms: The challenges posed by Bayesian analyses of large data sets. *Int. J. Plant Sci.* 2007; 168:137-157.
7. Soltis PS, Soltis DE. The origin and diversification of angiosperms. *Am. J. Bot.* **2004**; 91:1614-1626.
8. Wilkinson M. 2007. How many genes should a systematist sample? Conflicting insights from a phylogenomic matrix characterized by replicated incongruence. *Syst. Biol.* 56:355-363.
9. Zhang L-B, Simmons MP, Kocyan A, Renner SS (2006) Phylogeny of the Cucurbitales based on DNA sequences of nine loci from three genomes: Implications for morphological and sexual system evolution. *Molecular Phylogenetics and Evolution* **39**, 305-322.
10. Jansen RK, Cai Z, Raubeson LA, et al. (16 co-authors). Analysis of 81 genes from 64 plastid genomes resolves relationships in angiosperms and identifies genome-scale evolutionary patterns. *Proc. Natl. Acad. Sci. USA.* 2007; 104:19369-19374.

## Electronic Supplement, Stamatakis et al.

### *Maximum Likelihood Analyses of 3,490 rbcL Sequences: Scalability of Comprehensive Inference versus Group-Specific Taxon Sampling.*

This electronic supplement includes a list of phylogenetic relationships, either based on the inferred comprehensive *rbcL* trees (best ML tree) or literature (as cited), and frequencies of according bipartitions in bootstrap replicates using all data (*CA-BS*) and replicates using the group-restricted taxon subsampling (*GRTS-ML*; reduction factor 1/4; family-level taxonomic units). Monotypic families are referred to by the comprised genus' name.

Order of phylogenetic splits is as follows:

Relationships within Eurosid I (Fabidae) orders,

within Eurosid II orders (Malvidae),

within eudicot orders other than rosids,

and finally, higher level (backbone) relationships.

TUs may have been abbreviated, eg. Anis'ceae instead of Anisophyllaceae. Or {BCT} instead of Betulaceae-*Casuarina-Ticodendron* clade.

#### Further abbreviations

JK Jackknife-based support in cited literature

ML-JK under ML

P-JK under parsimony as optimality criterion.

NA Not available. Either because according taxon was not included at all, relationship was not found or support was not quantified in the original literature.

PP Bayesian-inferred posterior probabilities in cited literature

TU Taxonomic unit. TUs (family-level) used for GRTS are underlined, as well as order-level TUs.

#### Disclaimer:

This list has been assembled manually. Although rechecked several times, **it still may contain wrong values**. Please, refer also to the cited literature and use the data files that are supplied as additional Electronic Supplement. In case a correction is required, the authors may be contacted.

| Group (defined as TU) or relationship         | Zhang et al., 2006; multigene, ML-JK | Best ML tree, EURO1 matrix | CA-BS <sub>EURO1</sub> | GRTS-ML <sub>EURO1</sub> | Best ML tree, ROSID matrix | CA-BS <sub>ROSID</sub> | GRTS-ML <sub>ROSID</sub> | Best ML tree, EUDIS matrix | CA-BS <sub>EUDIS</sub> | GRTS-ML <sub>EUDIS</sub> |
|-----------------------------------------------|--------------------------------------|----------------------------|------------------------|--------------------------|----------------------------|------------------------|--------------------------|----------------------------|------------------------|--------------------------|
| <b>Cucurbitales</b>                           |                                      |                            |                        |                          |                            |                        |                          |                            |                        |                          |
| <i>Anisophylleaceae</i>                       | 100                                  | Clade                      | 100                    | 100                      | Clade                      | 100                    | 100                      | Clade                      | 100                    | 100                      |
| <i>Cucurbitaceae</i>                          | 100                                  | Clade                      | 93                     | 100                      | Clade                      | 95                     | 100                      | Clade                      | 99                     | 100                      |
| Anis'ceae sister to Cuc'ceae                  | Not found                            | No                         | 33                     | 70                       | Yes                        | 31                     | 42                       | Yes                        | 38                     | 40                       |
| <i>Begoniaceae</i>                            | 100                                  | Clade                      | 99                     | 100                      | Clade                      | 100                    | 100                      | Clade                      | 100                    | 100                      |
| <i>Datisca</i>                                | 100                                  | Clade                      | 99                     | 100                      | Clade                      | 98                     | 100                      | Clade                      | 100                    | 100                      |
| <i>Tetramelaceae</i>                          | 100                                  | Clade                      | 100                    | 100                      | Clade                      | 100                    | 100                      | Clade                      | 100                    | 100                      |
| Beg'ceae sister to <i>Datisca</i>             | 63                                   | Yes                        | 45                     | 71                       | Yes                        | 44                     | 34                       | Yes                        | 58                     | 42                       |
| Beg'ceae sister to <i>Tetramelaceae</i>       | Not found                            | No                         | 34                     | <20                      | No                         | 31                     | 36                       | No                         | 26                     | 24                       |
| Beg.-Dat.-Tetr. clade                         | 100                                  | No                         | 49                     | 67                       | Yes                        | 47                     | 44                       | Yes                        | 45                     | 42                       |
| Cuc'ceae sister to BDT clade                  | 78                                   | No                         | <20                    | 28                       | No                         | <20                    | 40                       | No                         | <20                    | 45                       |
| <i>Coriaria</i>                               | 100                                  | Clade                      | 100                    | 100                      | Clade                      | 100                    | 100                      | Clade                      | 100                    | 100                      |
| <i>Corynocarpus</i>                           | Not found                            | Clade                      | 100                    | 100                      | Clade                      | 99                     | 100                      | Clade                      | 100                    | 100                      |
| <i>Coriaria</i> sister to <i>Corynocarpus</i> | 100                                  | No                         | 23                     | 36                       | No                         | <20                    | 24                       | No                         | <20                    | <20                      |
| <i>Coriaria</i> sister to Tetr'ceae           | Not found                            | Yes                        | <20                    | <20                      | No                         | 23                     | <20                      | No                         | 32                     | <20                      |
| <i>Coriaria</i> -BDT clade                    | Not found                            | No                         | <20                    | 41                       | Yes                        | <20                    | 26                       | Yes                        | <20                    | 32                       |

|                                      | Best ML tree, EURO1 matrix | CA-BS <sub>EURO1</sub> | GRTS-ML <sub>EURO1</sub> | Best ML tree, ROSID matrix | CA-BS <sub>ROSID</sub> | GRTS-ML <sub>ROSID</sub> | Best ML tree, EUDIS matrix | CA-BS <sub>EUDIS</sub> | GRTS-ML <sub>EUDIS</sub> |
|--------------------------------------|----------------------------|------------------------|--------------------------|----------------------------|------------------------|--------------------------|----------------------------|------------------------|--------------------------|
| <b>Fabales</b>                       |                            |                        |                          |                            |                        |                          |                            |                        |                          |
| <i>Papilionoideae</i>                | Clade                      | 96                     | 99                       | Clade                      | 96                     | 96                       | Clade                      | 93                     | 93                       |
| <i>Mimosoideae</i>                   | Clade                      | 85                     | 100                      | Clade                      | 88                     | 100                      | Clade                      | 85                     | 100                      |
| <i>Caesalpinioideae</i> <sup>§</sup> | Grade                      | <20                    | <20                      | Grade                      | <20                    | <20                      | Grade                      | <20                    | 25                       |
| Caes'deae-Mim'deae clade             | No                         | <20                    | 52                       | No                         | <20                    | 54                       | No                         | <20                    | 61                       |
| <i>Fabaceae</i>                      | Clade                      | 90                     | 99                       | Clade                      | 88                     | 98                       | Clade                      | 77                     | 93                       |
| <i>Quillaja</i>                      | Singleton                  | —                      | —                        | Singleton                  | —                      | —                        | Singleton                  | —                      | —                        |
| <i>Surinamaceae</i>                  | Clade                      | 100                    | 100                      | Clade                      | 99                     | 100                      | Clade                      | 99                     | 100                      |
| <i>Polygalaceae</i>                  | Clade                      | 100                    | 100                      | Clade                      | 100                    | 100                      | Clade                      | 100                    | 100                      |
| Polyg'ceae sister to Sur'ceae        | Yes                        | 58                     | 94                       | Yes                        | 50                     | 72                       | Yes                        | 48                     | 74                       |
| Polyg'ceae sister to <i>Fabaceae</i> | No                         | 29                     | <20                      | No                         | 30                     | <20                      | No                         | 24                     | <20                      |

Misplaced *rbcL* accessions & taxa PapFb\_AY904389 (misabeled) → Oxalidales: Connaraceae

<sup>§</sup> Forming a 'basal' grade to the other two *Fabaceae* subfamilies or other *Fabales* according to *rbcL* data (depending of the root placement)

<sup>†</sup> Missing root phenomenon (cf. analyses of EURO1, ROSID, and EUDIS matrices)

|                                                   | Best ML tree, EURO1 matrix | CA-BS <sub>EURO1</sub> | GRTS-ML <sub>EURO1</sub> | Best ML tree, ROSID matrix | CA-BS <sub>ROSID</sub> | GRTS-ML <sub>ROSID</sub> | Best ML tree, EUDIS matrix | CA-BS <sub>EUDIS</sub> | GRTS-ML <sub>EUDIS</sub> |
|---------------------------------------------------|----------------------------|------------------------|--------------------------|----------------------------|------------------------|--------------------------|----------------------------|------------------------|--------------------------|
| <b>Fagales</b>                                    |                            |                        |                          |                            |                        |                          |                            |                        |                          |
| <i>Fagaceae</i>                                   | Clade                      | 91                     | 100                      | Clade                      | 96                     | 100                      | Clade                      | 91                     | 100                      |
| <i>Nothofagus</i>                                 | Clade                      | 100                    | 100                      | Clade                      | 100                    | 100                      | Clade                      | 100                    | 100                      |
| <i>Betulaceae</i>                                 | Grade                      | 63                     | 66                       | Clade                      | 65                     | 70                       | Grade                      | 55                     | 69                       |
| <i>Casuarinaceae</i>                              | Clade                      | 100                    | 100                      | Clade                      | 100                    | 100                      | Clade                      | 100                    | 100                      |
| Bet'ceae sister to Cas'ceae                       | Yes                        | 47                     | 81                       | No                         | 37                     | 86                       | Yes                        | 48                     | 74                       |
| <i>Ticodendron</i>                                | Clade                      | 100                    | 100                      | Clade                      | 100                    | 100                      | Clade                      | 100                    | 100                      |
| <i>Ticod.</i> sister to Cas'ceae                  | No                         | 26                     | <20                      | Yes                        | 24                     | <20                      | No                         | 24                     | <20                      |
| <i>Ticod.</i> -Bet.-Cas. clade                    | Yes                        | 60                     | 52                       | Yes                        | 62                     | 42                       | Yes                        | 66                     | 42                       |
| <i>Rhoiptelea</i>                                 | Singleton                  | —                      | —                        | Singleton                  | —                      | —                        | Singleton                  | —                      | —                        |
| <i>Juglandaceae</i>                               | Clade                      | 69                     | 73                       | Clade                      | 78                     | 86                       | Clade                      | 77                     | 84                       |
| <i>Rhoiptelea</i> sister to Jugl'ceae             | Yes                        | 98                     | 73                       | Yes                        | 99                     | 86                       | Yes                        | 100                    | 84                       |
| <i>Myricaceae</i>                                 | Clade                      | 91                     | 76                       | Clade                      | 88                     | 77                       | Clade                      | 88                     | 82                       |
| Myr.-BCT clade                                    | Unresolved                 | <20                    | 35                       | Unresolved                 | <20                    | 23                       | Unresolved                 | <20                    | 23                       |
| Myr'ceae sister to { <i>Rhoipt.</i> -Jugl.}-{BCT} | Unresolved                 | <20                    | <20                      | Unresolved                 | 24                     | <20                      | Unresolved                 | 31                     | <20                      |
| "Core higher hamamelids"                          | Yes                        | 62                     | 44                       | Yes                        | 67                     | 44                       | Yes                        | 72                     | 46                       |

Misplaced *rbcL* accessions & taxa MyrFa\_L01934 (misabeled) → Rosales: Cannabaceae

JugFa\_AY147094 (misabeled) → Eurosid II: Sapindales: Simaroubaceae

|                                            | Best ML tree, EURO1 matrix | CA-BS <sub>EURO1</sub> | GRTS-ML <sub>EURO1</sub> | Best ML tree, ROSID matrix | CA-BS <sub>ROSID</sub> | GRTS-ML <sub>ROSID</sub> | Best ML tree, EUDIS matrix | CA-BS <sub>EUDIS</sub> | GRTS-ML <sub>EUDIS</sub> |
|--------------------------------------------|----------------------------|------------------------|--------------------------|----------------------------|------------------------|--------------------------|----------------------------|------------------------|--------------------------|
| <b>Rosales</b>                             |                            |                        |                          |                            |                        |                          |                            |                        |                          |
| <i>Urticaceae</i>                          | Clade                      | 100                    | 100                      | Clade                      | 100                    | 100                      | Clade                      | 100                    | 100                      |
| <i>Moraceae</i>                            | Clade                      | 96                     | 48                       | Clade                      | 94                     | 73                       | Clade                      | 98                     | 84                       |
| <i>Cannabaceae</i> <sup>†</sup>            | Clade                      | 22                     | 44                       | Clade                      | 21                     | 60                       | Clade                      | 29                     | 63                       |
| Cann'ceae-Moraceae-Urt'ceae clade          | Yes                        | 44                     | 27                       | Yes                        | 46                     | 46                       | Yes                        | 53                     | 56                       |
| <i>Ulmaceae</i>                            | Clade                      | 81                     | 85                       | Clade                      | 78                     | 95                       | Clade                      | 67                     | 94                       |
| Ulmaceae-CMU clade                         | Yes                        | 94                     | 35                       | Yes                        | 92                     | 51                       | Yes                        | 95                     | 63                       |
| <i>Barbeya</i> + <i>Dirachma</i>           | No                         | 27                     | 56                       | Yes                        | 32                     | 38                       | Yes                        | 34                     | 53                       |
| <i>Elaeaginaceae</i>                       | Clade                      | 100                    | 100                      | Clade                      | 100                    | 100                      | Clade                      | 100                    | 100                      |
| <i>Rhamnaceae</i> <sup>†</sup>             | Grade                      | <20                    | 32                       | Diphyletic                 | <20                    | 54                       | Diphyletic                 | <20                    | 61                       |
| Ela'ceae sister to <i>Dirachma</i>         | Yes                        | 25                     | 29                       | No                         | 22                     | 44                       | No                         | <20                    | 27                       |
| Ela'ceae sister to Rhamn'ceae              | No                         | <20                    | 28                       | Pro parte                  | <20                    | <20                      | Pro parte                  | <20                    | 42                       |
| <i>Barbeya-Dirachma</i> -Ela.-Rhamn. clade | Yes                        | 29                     | 49                       | No                         | 33                     | 51                       | Yes                        | 29                     | 55                       |
| <i>Rosaceae</i>                            | Clade                      | 99                     | 76                       | Clade                      | 100                    | 85                       | Clade                      | 100                    | 92                       |

Misplaced *rbcL* accessions & taxa CanRo\_L12638 (misabeled) → Fagales: Myricaceae

CanRo\_AF062004 (misabeled) → Eurosid 2: Sapindales: Simaroubaceae

CanRo\_AY263941 (misabeled) → Ulmaceae

MorRo\_L01933 (misabeled) → Rosaceae

MorRo\_AJ390066 (misabeled) Among one of the *Rhamnaceae* subclades

<sup>†</sup> Cann'ceae form an unresolved polytomy in CA-BS, GRTS-ML based consensus trees, in which the *Moraceae* and *Urticaceae* clades are nested.

<sup>‡</sup> Family falls into two or more subclades (CA-BS<sub>subset</sub>=85 and 27; GRTS-ML<sub>subset</sub>=100 and 52; 4 clades, ROSID matrix) based on *rbcL* data

|                                         | Savolainen et al., 2000; <i>rbcL</i> , P-JK | Soltis & al., 2000, 2007; 3 genes incl. <i>rbcL</i> , P-BS/PP | Soltis & al., 2003; 4 genes incl. <i>rbcL</i> | Best ML tree, EURO1 matrix | CA-BS <sub>EURO1</sub> | GRTS-ML <sub>EURO1</sub> | Best ML tree, ROSID matrix | CA-BS <sub>ROSID</sub> | GRTS-ML <sub>ROSID</sub> | Best ML tree, EUDIS matrix | CA-BS <sub>EUDIS</sub> | GRTS-ML <sub>EUDIS</sub> |
|-----------------------------------------|---------------------------------------------|---------------------------------------------------------------|-----------------------------------------------|----------------------------|------------------------|--------------------------|----------------------------|------------------------|--------------------------|----------------------------|------------------------|--------------------------|
| <b>Celastrales</b>                      |                                             |                                                               |                                               |                            |                        |                          |                            |                        |                          |                            |                        |                          |
| <i>Celastraceae</i>                     | >50                                         | 99/1.0                                                        | 90                                            | Grade                      | <20                    | 44                       | Grade                      | <20                    | 59                       | Grade                      | <20                    | 63                       |
| <i>Lepuropetalon</i>                    | NA                                          | —                                                             | NA                                            | Singleton                  | —                      | —                        | Singleton                  | —                      | —                        | Singleton                  | —                      | —                        |
| <i>Parnassia</i>                        | Singleton                                   | —                                                             | —                                             | Clade                      | 59                     | 100                      | Clade                      | 54                     | 99                       | Clade                      | 56                     | 100                      |
| <i>Parnassiaceae</i> (s.l.; cf. APG II) | NA                                          | 100/1.0                                                       | NA                                            | Clade                      | 100                    | 100                      | Clade                      | 100                    | 100                      | Clade                      | 100                    | 100                      |
| Cel'ceae-Parn'ceae clade                | 99%                                         | 100/1.0                                                       | NA                                            | Yes                        | 65                     | 69                       | Yes                        | 71                     | 90                       | Yes                        | 72                     | 83                       |
| <i>Lepidobotryaceae</i>                 | NA                                          | NA                                                            | NA                                            | Clade                      | 100                    | 100                      | Clade                      | 100                    | 100                      | Clade                      | 100                    | 100                      |

Misplaced *rbcL* accessions & taxa CelCe\_AY935722; CelCe\_AY935723 (*Bhesa*) → Malpighiales: Unplaced (see *Malpighiales* below)

CelCe\_AY935740 (misabeled)

Low supported affinity to Celastrales p.p. (EUDIS matrix only); placing CelCe\_AY935740 as sister to OnaMy\_AY841634 (misabeled) outside rosids received CA-BS<sub>ROSID/EUDIS</sub>=999/22



|                                                                        | Savolainen et al., 2000; <i>rbcl</i> , P-JK | Soltis & al., 2000, 2007; 3 genes incl. <i>rbcl</i> , P-BS/PP | Soltis & al., 2003; 4 genes incl. <i>rbcl</i> | Best ML tree, EURO1 matrix | CA-BS <sub>EURO1</sub> | GRTS-ML <sub>EURO1</sub> | Best ML tree, ROSID matrix | CA-BS <sub>ROSID</sub> | GRTS-ML <sub>ROSID</sub> | Best ML tree, EUDIS matrix | CA-BS <sub>EUDIS</sub> | GRTS-ML <sub>EUDIS</sub> |
|------------------------------------------------------------------------|---------------------------------------------|---------------------------------------------------------------|-----------------------------------------------|----------------------------|------------------------|--------------------------|----------------------------|------------------------|--------------------------|----------------------------|------------------------|--------------------------|
| <b>Oxalidales</b>                                                      |                                             |                                                               |                                               |                            |                        |                          |                            |                        |                          |                            |                        |                          |
| <u>Brunelliaceae</u>                                                   | NA                                          | NA                                                            | NA                                            | Clade                      | 100                    | 100                      | Clade                      | 100                    | 100                      | Clade                      | 100                    | 100                      |
| <u>Cephalotus</u>                                                      | NA                                          | NA                                                            | NA                                            | Singleton                  | —                      | —                        | Singleton                  | —                      | —                        | Singleton                  | —                      | —                        |
| <u>Cunoniaceae</u>                                                     | Singleton                                   | 100/1.0                                                       | —                                             | Clade                      | 70                     | 97                       | Clade                      | 80                     | 99                       | Clade                      | 86                     | 100                      |
| <u>Elaeocarpaceae</u> (CA-BS incl./excl. <i>Sloanea</i> ) <sup>§</sup> | <50                                         | 76/1.0                                                        | 100                                           | Clade                      | <20/73 <sup>§</sup>    | 57                       | Clade                      | 22/67 <sup>§</sup>     | 91                       | Grade                      | 26/72 <sup>§</sup>     | 84                       |
| Elaeoc'ceae sister to <i>Cephalotus</i>                                | NA                                          | NA                                                            | NA                                            | Yes <sup>§</sup>           | <20/35 <sup>§</sup>    | 21                       | Yes <sup>§</sup>           | 25/35 <sup>§</sup>     | 49                       | (Yes) <sup>§</sup>         | 37                     | 42                       |
| <i>Cephal.</i> -Cun.-Elaeoc. clade <sup>§</sup>                        | 94                                          | 99/1.0                                                        | 98                                            | No                         | <20/<20 <sup>§</sup>   | 37                       | No                         | <20/<20 <sup>§</sup>   | 67                       | Unresolved                 | <20/<20 <sup>§</sup>   | 71                       |
| Brun'ceae-CCE clade <sup>§</sup>                                       | NA                                          | NA                                                            | NA                                            | Yes                        | 54/52 <sup>§</sup>     | 66                       | Yes                        | 65/38 <sup>§</sup>     | 97                       | Yes                        | 66/36 <sup>§</sup>     | 98                       |
| <u>Connaraceae</u>                                                     | Singleton                                   | NA                                                            | NA                                            | Clade                      | 100                    | 99                       | Clade                      | 100                    | 97                       | Clade                      | 100                    | 99                       |
| <u>Oxalidaceae</u>                                                     | Singleton                                   | 100/1.0                                                       | 100                                           | Grade                      | <20                    | <20                      | Grade                      | <20                    | <20                      | Grade                      | <20                    | <20                      |
| Conn'ceae-Oxal'ceae clade                                              | 99                                          | NA                                                            | NA                                            | Yes                        | 90                     | 23                       | Yes                        | 91                     | 96                       | Yes                        | 92                     | 99                       |

<sup>§</sup> EicOx\_AF022131 (*Sloanea*) placed aside the Elaeoc'ceae clade, either as sister of Oxalidales subclades or sister to all other Oxalidales (CA-BS<sub>EURO1/ROSID/EUDIS</sub>=41/29/29)

|                                                           | Soltis & al., 2000, 2007; 3 genes incl. <i>rbcl</i> , P-BS/PP | Davis & al., 2005; 4 genes, P-BS/PP | Best ML tree, EURO1 matrix | CA-BS <sub>EURO1</sub> | GRTS-ML <sub>EURO1</sub> | Best ML tree, ROSID matrix | CA-BS <sub>ROSID</sub> | GRTS-ML <sub>ROSID</sub> | Best ML tree, EUDIS matrix | CA-BS <sub>EUDIS</sub> | GRTS-ML <sub>EUDIS</sub> |
|-----------------------------------------------------------|---------------------------------------------------------------|-------------------------------------|----------------------------|------------------------|--------------------------|----------------------------|------------------------|--------------------------|----------------------------|------------------------|--------------------------|
| <b>Malpighiales</b>                                       |                                                               |                                     |                            |                        |                          |                            |                        |                          |                            |                        |                          |
| <u>Balanops</u>                                           | Singleton                                                     | Singleton                           | Clade                      | 100                    | 100                      | Clade                      | 100                    | 100                      | Clade                      | 100                    | 100                      |
| <u>Dichapetalaceae</u>                                    | Singleton                                                     | Singleton                           | Clade                      | 100                    | 100                      | Clade                      | 100                    | 100                      | Clade                      | 99                     | 100                      |
| <u>Trigonaceae</u>                                        | Singleton                                                     | Singleton                           | Clade                      | 100                    | 100                      | Clade                      | 100                    | 100                      | Clade                      | 100                    | 100                      |
| Dich'ceae + Trig'ceae                                     | 98/1.0                                                        | NA                                  | Yes                        | 45                     | 99                       | Yes                        | 51                     | 100                      | Yes                        | 56                     | 98                       |
| <u>Chrysobalanaceae</u>                                   | 100/1.0                                                       | NA                                  | Clade                      | 100                    | 100                      | Clade                      | 100                    | 100                      | Clade                      | 100                    | 100                      |
| <u>Euphronia</u>                                          | NA                                                            | Singleton                           | Singleton                  | —                      | —                        | Singleton                  | —                      | —                        | Singleton                  | —                      | —                        |
| Chrys'ceae + <i>Euphronia</i>                             | NA                                                            | NA                                  | Yes                        | 99                     | 100                      | Yes                        | 98                     | 100                      | Yes                        | 95                     | 100                      |
| Chrys'ceae s.l. (cf. APG II)                              | 99/?                                                          | NA                                  | Clade                      | 77                     | 100                      | Clade                      | 78                     | 100                      | Clade                      | 80                     | 99                       |
| <i>Balanops</i> sister to Chrys'ceae s.l.                 | 99/1.0                                                        | 100/1.0                             | Yes                        | 90                     | 100                      | Yes                        | 87                     | 100                      | Yes                        | 94                     | 100                      |
| <u>Picrodendraceae</u>                                    | 100/1.0                                                       | NA                                  | Clade                      | 100                    | 100                      | Clade                      | 100                    | 100                      | Clade                      | 100                    | 100                      |
| Picr'ceae sister to ( <i>Balanops</i> + Chrys'ceae)       | <50/0.95                                                      | Not found                           | No                         | <20                    | 89                       | No                         | 21                     | 92                       | Yes                        | <20                    | 87                       |
| <u>Medusagyna</u>                                         | Singleton                                                     | Singleton                           | Singleton                  | —                      | —                        | Singleton                  | —                      | —                        | Singleton                  | —                      | —                        |
| <u>Ochnaceae</u>                                          | Singleton                                                     | NA                                  | Clade                      | <20                    | 55                       | Clade                      | <20                    | 60                       | Diphyletic                 | 27                     | 60                       |
| <u>Quinaceae</u>                                          | Singleton                                                     | Singleton                           | Clade                      | 100                    | 100                      | Clade                      | 100                    | 100                      | Clade                      | 99                     | 100                      |
| Ochnaceae s.l. (cf. APG II)                               | 100/1.0                                                       | NA                                  | Clade                      | 99                     | 100                      | Clade                      | 99                     | 100                      | Clade                      | 100                    | 100                      |
| <u>Linaceae</u>                                           | 100/1.0                                                       | NA                                  | Clade                      | 100                    | 100                      | Clade                      | 100                    | 100                      | Clade                      | 100                    | 100                      |
| Linaceae sister to Picr.-Balan.-Chrys. clade              | Not found                                                     | Not found                           | No                         | <20                    | 53                       | No                         | <20                    | 25                       | Yes                        | <20                    | 26                       |
| Linaceae sister to Ochnaceae s.l.                         | Not found                                                     | Not found                           | Yes                        | <20                    | 22                       | Yes                        | <20                    | 25                       | No                         | <20                    | 22                       |
| <i>Bonnetia</i> (Bonnetiaceae) <sup>†§</sup>              | NA                                                            | Singleton <sup>†</sup>              | Singleton                  | —                      | —                        | Singleton                  | —                      | —                        | Singleton                  | —                      | —                        |
| <i>Ploiarium</i> (Bonn'ceae, outgroup <i>rbcl</i> )       | NA                                                            | NA                                  | Outtaxon                   | —                      | —                        | Outtaxon                   | —                      | —                        | Outtaxon                   | —                      | —                        |
| <u>Clusiaceae</u>                                         | Singleton                                                     | Singleton                           | Clade                      | 53                     | 95                       | Clade                      | 55                     | 96                       | Clade                      | 21                     | 82                       |
| <u>Podostemaceae</u>                                      | Singleton                                                     | Singleton                           | Clade                      | 100                    | 100                      | Clade                      | 100                    | 100                      | Clade                      | 100                    | 100                      |
| <u>Hypericaceae</u>                                       | Singleton                                                     | NA                                  | Clade                      | 75                     | 95                       | Clade                      | 75                     | 89                       | Clade                      | 80                     | 91                       |
| Hyp'ceae sister to Pod'ceae                               | 100/1.0                                                       | 100/1.0                             | Yes                        | 99                     | 100                      | Yes                        | 97                     | 100                      | Yes                        | 98                     | 99                       |
| Clus.-Hyp.-Pod. clade                                     | 99/1.0                                                        | Not found                           | Yes                        | 97                     | 100                      | Yes                        | 95                     | 100                      | Yes                        | 29                     | 84                       |
| <i>Bonnetia</i> -Clu.-Hyp.-Pod. clade <sup>†</sup>        | NA                                                            | 80/1.0 <sup>‡</sup>                 | Yes                        | 84                     | 100                      | Yes                        | 84                     | 100                      | Yes                        | 95                     | 84                       |
| <u>Elatinaceae</u>                                        | NA                                                            | Singleton                           | Clade                      | 100                    | 100                      | Clade                      | 100                    | 100                      | Clade                      | 100                    | 100                      |
| <u>Euphorbiaceae</u>                                      | Singleton                                                     | NA                                  | Clade                      | 50                     | 99                       | Clade                      | 51                     | 99                       | Clade                      | 51                     | 100                      |
| Elat'ceae sister to Euph'ceae                             | NA                                                            | Not found                           | No                         | 26                     | 78                       | No                         | 27                     | 61                       | No                         | 27                     | 77                       |
| {Euph.+Elat.} sister to Bon.-CHP clade                    | Not found                                                     | Not found                           | No                         | <20                    | 43                       | No                         | <20                    | 58                       | No                         | <20                    | 27                       |
| <u>Pandaceae</u>                                          | NA                                                            | NA                                  | Clade                      | 100                    | 100                      | Clade                      | 100                    | 100                      | Clade                      | 100                    | 100                      |
| Pandaceae sister to Bon.-CHP clade                        | NA                                                            | Not found                           | Yes                        | <20                    | 37                       | Yes                        | <20                    | <20                      | Yes                        | <20                    | <20                      |
| <u>Achariaceae</u>                                        | 99/1.0                                                        | NA                                  | Clade                      | 31                     | 61                       | Clade                      | 33                     | 68                       | Clade                      | 38                     | 72                       |
| <u>Goupia</u>                                             | Singleton                                                     | Singleton                           | Singleton                  | —                      | —                        | Singleton                  | —                      | —                        | Singleton                  | —                      | —                        |
| <u>Violaceae</u>                                          | Singleton                                                     | NA                                  | Clade                      | 100                    | 100                      | Clade                      | 100                    | 100                      | Clade                      | 100                    | 100                      |
| <i>Goupia</i> sister to Violaceae                         | Not found                                                     | Not found                           | Yes                        | 31                     | 80                       | Yes                        | 36                     | 67                       | Yes                        | 35                     | 67                       |
| <u>Lacistemataceae</u>                                    | Singleton                                                     | Singleton                           | Clade                      | 100                    | 100                      | Clade                      | 100                    | 100                      | Clade                      | 100                    | 100                      |
| <u>Malesherbiaceae</u>                                    | Singleton                                                     | Singleton                           | Singleton                  | —                      | —                        | Singleton                  | —                      | —                        | Singleton                  | —                      | —                        |
| <u>Passifloraceae</u>                                     | 93/1.0                                                        | NA                                  | Grade                      | 30                     | <20                      | Grade                      | 29                     | 54                       | Grade                      | 28                     | 61                       |
| <u>Turneraceae</u>                                        | Singleton                                                     | Singleton                           | Singleton                  | —                      | —                        | Singleton                  | —                      | —                        | Singleton                  | —                      | —                        |
| Pass'ceae -Turn'ceae clade                                | Not found                                                     | NA                                  | Yes                        | 69                     | 100                      | Yes                        | 64                     | 99                       | Yes                        | 63                     | 98                       |
| Pass'ceae s.l. (cf. APG II)                               | 100/1.0                                                       | NA                                  | Clade                      | 100                    | 100                      | Yes                        | 100                    | 100                      | Clade                      | 100                    | 100                      |
| <u>Salicaceae</u>                                         | 99/1.0                                                        | NA                                  | Clade                      | 80                     | 97                       | Clade                      | 82                     | 96                       | Clade                      | 75                     | 96                       |
| Sal'ceae sister to Lac'ceae                               | <50/0.99                                                      | 61/1.0                              | Yes                        | 26                     | 25                       | Yes                        | 29                     | 23                       | Yes                        | 37                     | 24                       |
| Sal'ceae sister to Pass'ceae s.l.                         | Not found                                                     | Not found                           | No                         | 25                     | 70                       | No                         | 22                     | 62                       | No                         | 21                     | 54                       |
| Ach.-GV-LPS clade <sup>#</sup>                            | <50/1.0                                                       | 59/1.0                              | Yes                        | 21                     | 86                       | Yes                        | 25                     | 73                       | Yes                        | 27                     | 83                       |
| <u>Caryocaraceae</u>                                      | Singleton                                                     | Singleton                           | Singleton                  | —                      | —                        | Singleton                  | —                      | —                        | Singleton                  | —                      | —                        |
| <i>Centropogon</i> sister to <i>Centropogon</i>           | NA                                                            | <50/0.66                            | Yes                        | 24                     | 62                       | Yes                        | 24                     | 50                       | Yes                        | <20                    | 57                       |
| <i>Bhesa</i> sister to <i>Ctenol.</i> + <i>Centropog.</i> | NA                                                            | NA                                  | Yes                        | <20                    | NA                       | No                         | <20                    | NA                       | Yes                        | <20                    | NA                       |
| <u>Erythroxylaceae</u>                                    | Singleton                                                     | Singleton                           | Clade                      | 100                    | 100                      | Clade                      | 100                    | 100                      | Clade                      | 100                    | 100                      |
| <u>Rhizophoraceae</u>                                     | 100/1.0                                                       | NA                                  | Clade                      | 86                     | 100                      | Clade                      | 87                     | 100                      | Clade                      | 86                     | 100                      |
| Rhiz'ceae s.l. (cf. APG II)                               | 99/1.0                                                        | NA                                  | Clade                      | 98                     | 100                      | Clade                      | 97                     | 100                      | Clade                      | 98                     | 100                      |
| <u>Irvingiaceae</u>                                       | Singleton                                                     | NA                                  | Clade                      | 100                    | 100                      | Clade                      | 100                    | 100                      | Clade                      | 100                    | 100                      |
| <u>Putranjivaceae</u>                                     | Singleton                                                     | NA                                  | Clade                      | 100                    | 100                      | Clade                      | 100                    | 100                      | Clade                      | 100                    | 100                      |
| <u>Ixonanthaceae</u>                                      | NA                                                            | NA                                  | Clade                      | 100                    | 100                      | Clade                      | 100                    | 100                      | Clade                      | 100                    | 100                      |
| <i>Bhesa</i> sister to Ixonanthaceae                      | NA                                                            | NA                                  | No                         | <20                    | NA                       | Yes                        | <20                    | NA                       | No                         | <20                    | NA                       |
| <u>Malpighiaceae</u> <sup>§</sup>                         | 100/1.0                                                       | NA                                  | Clade                      | 100                    | 100                      | Clade                      | 100                    | 100                      | Clade                      | 80                     | 97                       |
| <u>Humiriaceae</u>                                        | Singleton                                                     | NA                                  | Clade                      | 100                    | 100                      | Clade                      | 100                    | 100                      | Clade                      | 88                     | 100                      |
| <u>Lophopyxis</u>                                         | NA                                                            | Singleton                           | Singleton                  | —                      | —                        | Singleton                  | —                      | —                        | Singleton                  | —                      | —                        |
| <i>Lophopyxis</i> sister to Hum'ceae                      | NA                                                            | Not found                           | Yes                        | 27                     | 80                       | Yes                        | 26                     | 68                       | Yes                        | <20                    | 57                       |
| <i>Lophopyxis</i> sister to Putr'ceae                     | NA                                                            | 100/1.0                             | No                         | <20                    | <20                      | No                         | 22                     | <20                      | No                         | 28                     | 29                       |
| <u>Phyllanthaceae</u> <sup>†</sup>                        | NA                                                            | <50                                 | Clade                      | 47                     | 69                       | Clade                      | 39                     | 62                       | Clade                      | 41                     | 72                       |

Misplaced *rbcl* accessions & taxa BonMa\_AJ402990 (*Ploiarium*) [= Bon\_0 in GRTS-based SalMa\_AY757086 (*Gerrardina*)

→ Eurosid II: Malvales: Thymelaeaceae

*Rbcl* sequence of uncertain position (groups with *Petenaea*; CA-BS<sub>EUDIS</sub>=71)

<sup>§</sup> *Whittonia* (coded PdsSf\_AJ403018) is placed as sister taxon to the remaining Mal'ceae (CA-BS<sub>EUDIS</sub>=78)

<sup>†</sup> Comprising two well supported subclades (CA-BS<sub>ROSID</sub>=94 and 95)

<sup>‡</sup> TrsEr\_AY380342 (*Archytaea*; included as Bonnetiaceae by Davis et al., 2004) is placed as sister taxon to *Bonnetia* (CA-BS<sub>EUDIS</sub>=52) or sister to CHP clade (CA-BS<sub>EUDIS</sub>=42)

<sup>§</sup> [= Bon\_1 in GRTS-based analyses]

<sup>#</sup> Low support partly due to phylogenetic 'interference' with *Bhesa rbcl* accessions (sister to a Ach'ceae subclade received e.g. CA-BS<sub>EUDIS</sub>=25)

| Group (defined as TU) or relationship                       | Best ML tree, EURO2 matrix | CA-BS <sub>EURO2</sub> | GRTS-ML <sub>EURO2</sub> | Best ML tree, ROSID matrix | CA-BS <sub>ROSID</sub> | GRTS-ML <sub>ROSID</sub> | Best ML tree, EUDIS matrix | CA-BS <sub>EUDIS</sub> | GRTS-ML <sub>EUDIS</sub> |
|-------------------------------------------------------------|----------------------------|------------------------|--------------------------|----------------------------|------------------------|--------------------------|----------------------------|------------------------|--------------------------|
| <b>Brassicales</b>                                          |                            |                        |                          |                            |                        |                          |                            |                        |                          |
| <i>Batis</i>                                                | Singleton                  | —                      | —                        | Singleton                  | —                      | —                        | Singleton                  | —                      | —                        |
| Salvadoraceae                                               | Grade                      | <20                    | 30                       | Grade                      | <20                    | 28                       | Grade                      | <20                    | 30                       |
| <i>Batis</i> -Salv'ceae clade                               | Yes                        | 100                    | 100                      | Yes                        | 100                    | 100                      | Yes                        | 100                    | 100                      |
| <i>Koerberlinia</i>                                         | Singleton                  | —                      | —                        | Singleton                  | —                      | —                        | Singleton                  | —                      | —                        |
| <i>Koerberlinia</i> sister to <i>Batis</i> -Salv. clade     | Yes                        | 62                     | 97                       | Yes                        | 65                     | 100                      | Yes                        | 74                     | 100                      |
| <b>Brassicaceae s.str.</b>                                  | Clade                      | 90                     | 92                       | Clade                      | 84                     | 96                       | Clade                      | 88                     | 100                      |
| Cleomaceae                                                  | Clade                      | 98                     | 100                      | Clade                      | 98                     | 100                      | Clade                      | 98                     | 100                      |
| Brass'ceae s.str. sister to Cleomaceae                      | Yes                        | 94                     | 92                       | Yes                        | 97                     | 96                       | Yes                        | 95                     | 94                       |
| Capparaceae                                                 | Clade                      | 58                     | 52                       | Clade                      | 60                     | 54                       | Clade                      | 67                     | 59                       |
| Brassicaceae (cf. APG II)                                   | Clade                      | 100                    | 60                       | Clade                      | 100                    | 59                       | Clade                      | 99                     | 67                       |
| Gyrostemonaceae                                             | Clade                      | 100                    | 100                      | Clade                      | 100                    | 100                      | Clade                      | 100                    | 100                      |
| Resedaceae                                                  | Clade                      | 100                    | 82                       | Clade                      | 100                    | 78                       | Clade                      | 100                    | 86                       |
| Gyr'ceae sister to Res'ceae                                 | Yes                        | 72                     | 47                       | Yes                        | 79                     | 54                       | Yes                        | 82                     | 68                       |
| <i>Emblingia</i> (Chand.&Bay.2000) <sup>§</sup>             | Singleton <sup>§</sup>     | —                      | —                        | Singleton <sup>§</sup>     | —                      | —                        | Singleton <sup>§</sup>     | —                      | —                        |
| <i>Pentadiplandra</i>                                       | Singleton                  | —                      | —                        | Singleton                  | —                      | —                        | Singleton                  | —                      | —                        |
| <i>Tovaria</i>                                              | Singleton                  | —                      | —                        | Singleton                  | —                      | —                        | Singleton                  | —                      | —                        |
| <i>Tovaria</i> sister to <i>Emblingia</i> (Chand.&Bay.2000) | Yes                        | 45                     | 63                       | Yes                        | 40                     | <20                      | No                         | 46                     | 21 <sup>§</sup>          |
| Brass.-Gyr.-Res.-Pent.-Tov. clade                           | No                         | 43                     | 33                       | Yes                        | 47                     | 85                       | Yes                        | 37                     | 76                       |
| Brass.- <i>Emblingia</i> -Pent.-Tov. clade                  | Yes                        | 24                     | 24                       | Yes                        | <20                    | <20                      | No                         | 23                     | <20                      |
| <i>Emblingia</i> -BGRPT clade                               | Yes                        | 79                     | 92                       | Yes                        | 83                     | 96                       | Yes                        | 82                     | 94 <sup>§</sup>          |
| KBS clade sister to ( <i>Emb.</i> -)BGRPT clade             | Yes                        | 74                     | 92                       | Yes                        | 75                     | 96                       | Yes                        | 85                     | 94                       |
| Limnanthaceae                                               | Clade                      | 100                    | 100                      | Clade                      | 100                    | 100                      | Clade                      | 100                    | —                        |
| <i>Setchellanthus</i>                                       | Singleton                  | —                      | —                        | Singleton                  | —                      | —                        | Singleton                  | —                      | —                        |
| Limn'ceae sister to KBS + ( <i>Emb.</i> -)BGRPT             | Yes                        | 53                     | 92                       | No                         | 52                     | 44                       | No                         | 64                     | 32                       |
| <i>Setchell.</i> sister to KBS + ( <i>Emb.</i> -)BGRPT      | No                         | <20                    | <20                      | Yes                        | 25                     | 52                       | Yes                        | 23                     | 61                       |
| Brassicales core clade                                      | Yes                        | 99                     | 92                       | Yes                        | 99                     | 96                       | Yes                        | 100                    | 94                       |
| <b>Caricaceae</b>                                           | Clade                      | 100                    | 100                      | Clade                      | 100                    | 100                      | Clade                      | 100                    | 100                      |
| <i>Moringa</i>                                              | Clade                      | 93                     | 100                      | Clade                      | 96                     | 100                      | Clade                      | 98                     | 100                      |
| Car'ceae sister to <i>Moringa</i>                           | Yes                        | 53                     | 72                       | Yes                        | 55                     | 66                       | Yes                        | 61                     | 66                       |
| {Car'ceae + <i>Moringa</i> } sister to Br'ales core clade   | Yes                        | 75                     | 90                       | Yes                        | 76                     | 81                       | Yes                        | 68                     | 86                       |
| Akaniaceae s.l. ( <i>Akania</i> + <i>Bretschneidera</i> )   | Yes                        | 92                     | 100                      | Yes                        | 88                     | 100                      | Yes                        | 91                     | 100                      |
| <i>Tropaeolum</i>                                           | Clade                      | 100                    | 100                      | Clade                      | 100                    | 100                      | Clade                      | 100                    | 100                      |
| <i>Tropaeolum</i> sister to Akan'ceae                       | Yes                        | 100                    | 100                      | Yes                        | 100                    | 100                      | Yes                        | 100                    | 100                      |

Misplaced *rbcL* accessions & taxa BraBr\_X73284 (*Sinapsis*)

CapBr\_AY483279 (*Tirania*)

EmbBr\_AJ402949 (misabeled, see footnote)  
[:= Emb\_0 in GRTS-based analyses]

→ Eurosids I: Fabales: Fabaceae: Papilionideae

→ Resedaceae

Groups with ComMy\_AF281478 (CA-BS<sub>ROSID</sub>=80), and BerRa\_AF203487 (CA-BS<sub>EUDIS</sub>=100); this 3-taxon clade is sister to Ericales (GRTS-

<sup>§</sup> Two *rbcL* accessions are available from this taxon, one (EmbBr\_AJ402949, Savolainen et al. 2000, *Kew Bull.* [:= Emb\_0]) is not a Brassicales *rbcL*, the other is (EmbBr\_AF146014, Chandler & Bayer, 2000 [:= Emb\_1 in GRTS replicates]).

| Group (defined as TU) or relationship          | Best ML tree, EURO2 matrix | CA-BS <sub>EURO2</sub> | GRTS-ML <sub>EURO2</sub> | Best ML tree, ROSID matrix | CA-BS <sub>ROSID</sub> | GRTS-ML <sub>ROSID</sub> | Best ML tree, EUDIS matrix | CA-BS <sub>EUDIS</sub> | GRTS-ML <sub>EUDIS</sub> |
|------------------------------------------------|----------------------------|------------------------|--------------------------|----------------------------|------------------------|--------------------------|----------------------------|------------------------|--------------------------|
| <b>Huertales</b>                               |                            |                        |                          |                            |                        |                          |                            |                        |                          |
| <i>Dipentodon</i>                              | Clade                      | 100                    | 100                      | Clade                      | 100                    | 100                      | Clade                      | 100                    | 100                      |
| <i>Perrottetia</i>                             | Clade                      | 100                    | 100                      | Clade                      | 100                    | 100                      | Clade                      | 100                    | 100                      |
| Tapisciaceae                                   | Clade                      | 88                     | 100                      | Clade                      | 76                     | 100                      | Clade                      | 84                     | 100                      |
| <i>Dipentodon</i> sister to <i>Perrottetia</i> | Yes                        | 55                     | 99                       | Yes                        | 66                     | 100                      | Yes                        | 71                     | 100                      |
| <i>Perrottetia</i> sister to Tapisciaceae      | No                         | 30                     | 0                        | No                         | 30                     | 0                        | No                         | 26                     | 0                        |

Triangle case #1:  
Imbalanced

| Group (defined as TU) or relationship         | Best ML tree, EURO2 matrix | CA-BS <sub>EURO2</sub> | GRTS-ML <sub>EURO2</sub> | Best ML tree, ROSID matrix | CA-BS <sub>ROSID</sub> | GRTS-ML <sub>ROSID</sub> | Best ML tree, EUDIS matrix | CA-BS <sub>EUDIS</sub> | GRTS-ML <sub>EUDIS</sub> |
|-----------------------------------------------|----------------------------|------------------------|--------------------------|----------------------------|------------------------|--------------------------|----------------------------|------------------------|--------------------------|
| <b>Malvales</b>                               |                            |                        |                          |                            |                        |                          |                            |                        |                          |
| <i>Bixa</i>                                   | Singleton                  | —                      | —                        | Singleton                  | —                      | —                        | Singleton                  | —                      | —                        |
| <i>Cochlospermum</i>                          | Clade                      | 100                    | 100                      | Clade                      | 100                    | 100                      | Clade                      | 100                    | 100                      |
| <i>Diegodendron</i>                           | Singleton                  | —                      | —                        | Singleton                  | —                      | —                        | Singleton                  | —                      | —                        |
| <i>Bixa</i> sister to <i>Diegodendron</i>     | Yes                        | 98                     | 100                      | Yes                        | 97                     | 100                      | Yes                        | 99                     | 100                      |
| Bixaceae (s.l.; cf. APG II)                   | Clade                      | 75                     | 98                       | Clade                      | 72                     | 100                      | Clade                      | 77                     | 100                      |
| Sphaerosepalaceae                             | Clade                      | 100                    | 100                      | Clade                      | 100                    | 100                      | Clade                      | 100                    | 100                      |
| Sphaer'ceae sister to Bixaceae                | Yes                        | 45                     | 98                       | Yes                        | 46                     | 75                       | Yes                        | 47                     | 81                       |
| Cistaceae                                     | Clade                      | 100                    | 100                      | Clade                      | 100                    | 100                      | Clade                      | 100                    | 100                      |
| Dipterocarpaceae s.str. (APG II)              | Grade                      | 42                     | 78                       | Grade                      | 40                     | 77                       | Grade                      | 30                     | 100                      |
| Sarcocaulaceae                                | Clade                      | 99                     | 100                      | Clade                      | 99                     | 100                      | Clade                      | 99                     | 100                      |
| Dipterocarpaceae sensu APW                    | Clade                      | 98                     | 100                      | Clade                      | 97                     | 100                      | Clade                      | 90                     | 100                      |
| Cistaceae sister to Dipt'ceae                 | Yes                        | 100                    | 100                      | Yes                        | 100                    | 100                      | Yes                        | 100                    | 100                      |
| Neuradaceae                                   | Singleton                  | —                      | —                        | Singleton                  | —                      | —                        | Singleton                  | —                      | —                        |
| Neur'ceae sister to Cist'ceae-Dipt'ceae clade | Yes                        | 45                     | 46                       | Yes                        | 45                     | 23                       | Yes                        | 62                     | 47                       |
| Muntingiaceae                                 | Clade                      | 99                     | 100                      | Clade                      | 99                     | 100                      | Clade                      | 100                    | 100                      |
| <i>Petenaea</i> <sup>†</sup>                  | Singleton                  | —                      | —                        | Singleton                  | —                      | —                        | Singleton                  | —                      | —                        |
| Muntingiaceae s.l.                            | Diphyletic                 | 0                      | 0                        | Diphyletic                 | 0                      | 0                        | Diphyletic                 | 0                      | 0                        |
| Muntingiaceae sister to CDN clade             | Yes                        | 49                     | 46                       | Yes                        | 45                     | 22                       | Yes                        | 55                     | 47                       |
| Malvaceae                                     | Clade                      | 100                    | 100                      | Clade                      | 99                     | 96                       | Clade                      | 100                    | 84                       |
| Thymelaeaceae                                 | Clade                      | 97                     | 100                      | Clade                      | 97                     | 88                       | Clade                      | 99                     | 85                       |
| Thy'ceae sister to {Cist.+Dipt.} clade        | Yes                        | 21                     | 52                       | No                         | 22                     | 77                       | No                         | <20                    | 51                       |
| Thy'ceae-{Munt.'ceae+CDN} clade               | No                         | <20                    | 33                       | No                         | <20                    | 27                       | Yes                        | <20                    | 30                       |

† The stored *rbcl* sequence of this taxon is not supportive for the inclusion of *Petenea* in the Malvales.

**Sapindales**

|                                                   |            |     |     |            |     |     |            |                     |     |
|---------------------------------------------------|------------|-----|-----|------------|-----|-----|------------|---------------------|-----|
| <u>Anacardiaceae</u>                              | Clade      | 68  | 81  | Clade      | 63  | 79  | Clade      | 69                  | 79  |
| <u>Burseraceae</u>                                | Clade      | 90  | 100 | Clade      | 91  | 100 | Clade      | 99                  | 100 |
| Anac'ceae sister to Burs'ceae                     | Yes        | 94  | 85  | Yes        | 91  | 79  | Yes        | 97                  | 85  |
| <u>Kirkiaceae</u>                                 | Singleton  | —   | —   | Singleton  | —   | —   | Singleton  | —                   | —   |
| Kirk'ceae sister to Anac.-Burs. clade             | Yes        | 55  | 72  | Yes        | 60  | 70  | Yes        | 71                  | 71  |
| <u>Meliaceae</u>                                  | Clade      | 94  | 100 | Clade      | 87  | 98  | Clade      | 92                  | 98  |
| <u>Rutaceae</u> <sup>§</sup>                      | Clade      | 92  | 99  | Clade      | 89  | 96  | Clade      | <20/63 <sup>§</sup> | 92  |
| <u>Simaroubaceae</u>                              | Clade      | 100 | 85  | Clade      | 100 | 78  | Clade      | 99                  | 81  |
| Sim'ceae sister to Mel'ceae                       | Yes        | 56  | 25  | Yes        | 63  | 28  | Yes        | 62                  | 27  |
| Sim'ceae sister to Rut'ceae                       | No         | 34  | 57  | No         | 30  | 25  | No         | <20                 | 35  |
| Mel.-Rut.-Sim. clade <sup>§</sup>                 | Yes        | 97  | 84  | Yes        | 98  | 53  | Yes        | 26/74 <sup>§</sup>  | 58  |
| ABK clade sister to MRS clade                     | Unresolved | <20 | 32  | Unresolved | 24  | 23  | Unresolved | <20                 | 22  |
| <u>Sapindaceae</u>                                | Clade      | 97  | 99  | Clade      | 98  | 92  | Clade      | 100                 | 94  |
| Sap'ceae sister to MRS clade                      | Unresolved | <20 | 32  | Unresolved | <20 | 23  | Unresolved | <20                 | 25  |
| Sap'ceae-ABK-MRS clade <sup>§</sup>               | Yes        | 42  | 97  | Yes        | 41  | 63  | Yes        | <20/31 <sup>§</sup> | 63  |
| <u>Biebersteinia</u>                              | Singleton  | —   | —   | Singleton  | —   | —   | Singleton  | —                   | —   |
| <i>Biebersteinia</i> sister to Sap.-ABK-MRS clade | No         | <20 | 84  | Yes        | <20 | 59  | Yes        | <20                 | 61  |
| <u>Nitraria</u>                                   | Clade      | 98  | 71  | Clade      | 97  | 70  | Clade      | 98                  | 61  |
| <u>Tetradiclis</u>                                | Singleton  | —   | —   | Singleton  | —   | —   | Singleton  | —                   | —   |
| <u>Peganum</u>                                    | Clade      | 100 | 71  | Clade      | 100 | 69  | Clade      | 100                 | 61  |
| <i>Nitraria</i> sister to <i>Tetradiclis</i>      | Yes        | 61  | 70  | Yes        | 64  | 60  | Yes        | 50                  | 59  |
| Nitrariaceae (cf. APG II)                         | Clade      | 99  | 100 | Clade      | 100 | 92  | Clade      | 100                 | 91  |

† Including mislabeled EbeEr\_AF421094; the alternative is to place this accession as sister to all Sapindales (CA-BS<sub>EUDIS</sub>=24)

Misplaced accessions SapSp\_AJ402931 (*Bottegoa*) → Rutaceae  
 SimSp\_AY510146 (mislabeled) → Anacardiaceae  
 NitSp\_DQ267159 (mislabeled) Nested among *Peganum* accessions

Now included in eurosids II (Wang & al., 2009):

|                                                          | Soletis & al.,<br>2000, 2007;<br>P-BS/PP | Best ML tree,<br>ROSID matrix | CA-BS <sub>ROSID</sub> | GRTS-ML <sub>ROSID</sub> | Best ML tree,<br>EUDIS matrix | CA-BS <sub>EUDIS</sub> | GRTS-ML <sub>EUDIS</sub> |
|----------------------------------------------------------|------------------------------------------|-------------------------------|------------------------|--------------------------|-------------------------------|------------------------|--------------------------|
| <b>Crossosomatales</b>                                   |                                          |                               |                        |                          |                               |                        |                          |
| <u>Aphloia</u>                                           | Singleton                                | —                             | —                      | —                        | Singleton                     | —                      | —                        |
| <i>Ixerba</i> + <i>Strasburgeria</i>                     | NA                                       | Yes                           | 98                     | 100                      | Yes                           | 100                    | 100                      |
| <i>Geissoloma</i> sister to <i>Ix.-Strasb.</i> clade     | NA                                       | Yes                           | 52                     | 100                      | Yes                           | 65                     | 100                      |
| <i>Aphloia</i> sister to <i>Geiss.-Ix.-Strasb.</i> clade | Not found                                | Yes                           | 26                     | 93                       | Yes                           | 33                     | 100                      |
| <u>Crossosomataceae</u>                                  | Singleton                                | Clade                         | 99                     | 100                      | Clade                         | 98                     | 100                      |
| <u>Stachyurus</u> sister to Cross'ceae                   | 96/1.0                                   | Yes                           | 47                     | 89                       | Yes                           | 52                     | 85                       |
| <i>Guamatela</i> -Cross.- <i>Stachyurus</i> clade        | NA                                       | Yes                           | 52                     | 88                       | Yes                           | 65                     | 85                       |
| <u>Staphyleaceae</u>                                     | Singleton                                | Clade                         | 99                     | 60                       | Clade                         | 100                    | 69                       |
| Staph'ceae sister to CGS clade                           | 100/1.0                                  | Yes                           | 87                     | 60                       | Yes                           | 95                     | 69                       |

Misplaced *rbcl* accessions & taxa StaCs\_AY646109 (*Huertea*) Sister to Huerteales (see Backbone)

**Geraniales**

|                                                             |           |           |     |     |           |     |     |
|-------------------------------------------------------------|-----------|-----------|-----|-----|-----------|-----|-----|
| <u>Geraniaceae</u>                                          | 100/1.0   | Clade     | 100 | 100 | Clade     | 100 | 100 |
| <i>Hypseocharis</i>                                         | NA        | Clade     | 100 | 100 | Clade     | 100 | 100 |
| Ger'ceae s.l. (cf. APG II; Ger'ales 1)                      | NA        | Clade     | 100 | 100 | Clade     | 100 | 100 |
| <u>Ledocarpaceae</u>                                        | NA        | Singleton | —   | —   | Singleton | —   | —   |
| <u>Vivianiaceae</u>                                         | Singleton | Singleton | —   | —   | Singleton | —   | —   |
| Led'ceae sister to Viv'ceae                                 | NA        | Yes       | 96  | 100 | Yes       | 99  | 100 |
| <u>Melanthaceae</u> (incl. <i>Greyia</i> , <i>Francoa</i> ) | Singleton | Singleton | —   | —   | Singleton | —   | —   |
| Melia'ceae sister to Led.-Viv. clade (Ger'ales 2)           | <50/0.97  | Yes       | 44  | 63  | Yes       | 57  | 99  |

|                                                | Best ML tree,<br>ROSID matrix | CA-BS <sub>ROSID</sub> | GRTS-ML <sub>ROSID</sub> | Best ML tree,<br>EUDIS matrix | CA-BS <sub>EUDIS</sub> | GRTS-ML <sub>EUDIS</sub> |
|------------------------------------------------|-------------------------------|------------------------|--------------------------|-------------------------------|------------------------|--------------------------|
| <b>Myrtales</b>                                |                               |                        |                          |                               |                        |                          |
| <u>Alzatea</u>                                 | Singleton                     | —                      | —                        | Singleton                     | —                      | —                        |
| <u>Olinia</u>                                  | Clade                         | 92                     | 100                      | Clade                         | 96                     | 100                      |
| <u>Penaeaceae</u>                              | Clade                         | 93                     | 100                      | Clade                         | 94                     | 100                      |
| <i>Olinia</i> sister to Penaeaceae             | Yes                           | 45                     | 90                       | Yes                           | 54                     | 85                       |
| <u>Rhynchochalyx</u>                           | Clade                         | 81                     | 100                      | Clade                         | 88                     | 100                      |
| <i>Olinia</i> -Pen'ceae- <i>Rhynch.</i> clade  | Yes                           | 60                     | 90                       | Yes                           | 64                     | 85                       |
| <i>Alzatea</i> -OPR clade                      | Yes                           | 76                     | 100                      | Yes                           | 82                     | 100                      |
| <u>Crypteroniaceae</u>                         | Clade                         | 100                    | 100                      | Clade                         | 99                     | 100                      |
| Crypt'ceae sister to <i>Alzatea</i> -OPR clade | Yes                           | 93                     | 100                      | Yes                           | 93                     | 100                      |
| <u>Melastomataceae</u>                         | Clade                         | 94                     | 100                      | Clade                         | 94                     | 100                      |
| <u>Memecylaceae</u>                            | Clade                         | 100                    | 100                      | Clade                         | 100                    | 100                      |
| Mel'ceae s.l. (APG II)                         | Clade                         | 100                    | 100                      | Clade                         | 100                    | 100                      |
| Mel'ceae sister to Cry.-Alz.-OPR clade         | Yes                           | 99                     | 100                      | Yes                           | 99                     | 100                      |
| <i>Heteropyxis</i> + <i>Psiloxylum</i>         | Yes                           | 60                     | 96                       | Yes                           | 62                     | 97                       |
| <u>Myrtaceae</u> s.str. (APG II)               | Clade                         | 41                     | 91                       | Clade                         | 43                     | 93                       |
| Myrtaceae (sensu APW)                          | Clade                         | 44                     | 68                       | Clade                         | 54                     | 65                       |
| <u>Vochysiaceae</u>                            | Clade                         | 98                     | 100                      | Clade                         | 100                    | 100                      |
| Myrtaceae s.l.-Voch'ceae clade                 | Yes                           | 79                     | 98                       | Yes                           | 69                     | 100                      |
| MCA{OPR} clade sister to Myrt.-Voch. clade     | Yes                           | 73                     | 95                       | Yes                           | 65                     | 98                       |
| <u>Combretaceae</u>                            | Clade                         | 95                     | 81                       | Clade                         | 98                     | 78                       |
| <u>Lythraceae</u>                              | Clade                         | 50                     | 63                       | Clade                         | 52                     | 69                       |
| <u>Onagraceae</u>                              | Clade                         | 96                     | 89                       | Clade                         | 95                     | 92                       |
| Lythraceae-Onagraceae clade                    | Yes                           | 96                     | 89                       | Yes                           | 99                     | 93                       |
| Comb'r'ceae sister to Lyth.-Onag. clade        | Yes                           | 69                     | 73                       | Yes                           | 80                     | 70                       |

Misplaced *rbcl* accessions & taxa ComMy\_AF281477 (*Conocarpus*) → Eurosids II: Malvales: Malvaceae  
 ComMy\_AF281478 (*Calycopteris*) Groups with BerRa\_AF203487 and EmbBr\_AJ402949  
 OnaMy\_AY841634 (*Mkilua*) See CelCe\_AY935740 (*Eurosid I orders*); alternative placements are as sister

| TU (order/family/unplaced taxon) or relationship            | Cuénoud et al., 2002,<br><i>rbcl</i> only | Cuénoud et al., 2002<br>[Cameron et al., 2002] | Soltis & al., 2000, 2007;<br>3 genes incl. <i>rbcl</i> ,<br>P-BS/PP | Hilu et al., 2003; <i>matK</i>                             | Best ML tree EUDIS<br>matrix | CA-BS <sub>EUDIS</sub> | GRTS-ML <sub>EUDIS</sub> |
|-------------------------------------------------------------|-------------------------------------------|------------------------------------------------|---------------------------------------------------------------------|------------------------------------------------------------|------------------------------|------------------------|--------------------------|
| <b>Caryophyllales</b>                                       |                                           |                                                |                                                                     |                                                            |                              |                        |                          |
| <i>Ancistrocladus</i>                                       | Singleton                                 | Singleton                                      | NA                                                                  | Singleton                                                  | Clade                        | 100                    | 100                      |
| <i>Dioncophyllaceae</i>                                     | Singleton                                 | Singleton                                      | Singleton                                                           | Singleton                                                  | Singleton                    | —                      | —                        |
| <i>Ancistrocladus</i> sister to Dion'ceae                   | 56                                        | 100                                            | NA                                                                  | 100                                                        | Yes                          | 89                     | 100                      |
| <i>Drosophyllum</i>                                         | NA                                        | [Singleton]                                    | NA                                                                  | Singleton                                                  | Singleton                    | —                      | —                        |
| <i>Drosoph.</i> sister to Anc.-Dion. clade [APW]            | NA                                        | [99]                                           | NA                                                                  | 99                                                         | No                           | 37                     | 63                       |
| <i>Drosoph.</i> sister to <i>Droseraceae</i>                | NA                                        | [Not found]                                    | NA                                                                  | Not found                                                  | Yes                          | 38                     | 37                       |
| <i>Nepenthes</i>                                            | Singleton                                 | Singleton                                      | Singleton                                                           | Singleton                                                  | Singleton                    | —                      | —                        |
| <i>Nepenthes</i> sister to { <i>Ancistr.</i> +Dion.} clade  | NA                                        | Not found                                      | NA                                                                  | Unresolved                                                 | Yes                          | <20                    | 36                       |
| <i>Nepenthes</i> -ADD clade [APW]                           | <50                                       | [81]                                           | 91/1.0                                                              | Unresolved                                                 | No                           | <20                    | 23                       |
| <i>Droseraceae</i>                                          | Singleton                                 | Singleton                                      | Singleton                                                           | Singleton                                                  | Clade                        | 100                    | 100                      |
| <i>Nepenthes</i> sister to <i>Droseraceae</i>               | <50                                       | 59                                             | Not found                                                           | Unresolved                                                 | No                           | <20                    | 39                       |
| Car'ales clade A                                            | <50                                       | 72                                             | Not found                                                           | 96                                                         | Clade                        | 44                     | 95                       |
| <i>Frankenia</i>                                            | Singleton                                 | Singleton                                      | NA                                                                  | Singleton                                                  | Singleton                    | —                      | —                        |
| <i>Tamaricaceae</i>                                         | Singleton                                 | Singleton                                      | Singleton                                                           | Singleton                                                  | Singleton                    | —                      | —                        |
| <i>Frankenia</i> sister to Tam'ceae                         | 96                                        | 100                                            | NA                                                                  | 100                                                        | Yes                          | 99                     | 100                      |
| <i>Plumbaginaceae</i>                                       | 100                                       | 100                                            | Singleton                                                           | 100                                                        | Clade                        | 100                    | 90                       |
| <i>Polygonaceae</i>                                         | 98                                        | 100                                            | Singleton                                                           | 100                                                        | Clade                        | 100                    | 90                       |
| Plum'ceae sister to Polyg'ceae                              | 92                                        | 100                                            | 100/1.0                                                             | 100                                                        | Yes                          | 99                     | 100                      |
| Car'ales clade B                                            | <50                                       | 61                                             | Not found                                                           | 90                                                         | Grade                        | <20                    | <20                      |
| { <i>Frankenia</i> + Tam'ceae} sister to clade A            | NA                                        | Not found                                      | Not found                                                           | Not found                                                  | Yes                          | 21                     | 85                       |
| {Tam'ceae + Dros'ceae} sister to Plum.-Polyg. clade         | Not found                                 | Not found                                      | <50/n.f.                                                            | Not found                                                  | No                           | <20                    | <20                      |
| A-B clade ("non-core Car'ales")                             | <50                                       | 95                                             | 85/1.0                                                              | 74                                                         | Yes                          | 43                     | 95                       |
| <i>Rhabdodendron</i>                                        | Singleton                                 | Singleton                                      | NA                                                                  | Singleton                                                  | Singleton                    | —                      | —                        |
| <i>Asteropeia</i>                                           | Singleton                                 | Singleton                                      | Singleton                                                           | Singleton                                                  | Clade                        | 100                    | 100                      |
| <i>Physena</i>                                              | NA                                        | NA                                             | NA                                                                  | NA                                                         | Singleton                    | —                      | —                        |
| <i>Asteropeia</i> sister to <i>Physena</i> (clade C)        | NA                                        | NA                                             | NA                                                                  | NA                                                         | Clade                        | 100                    | 100                      |
| <i>Achatocarpaceae</i>                                      | NA                                        | NA                                             | NA                                                                  | 100                                                        | Clade                        | 100                    | 100                      |
| <i>Amaranthaceae</i>                                        | 91                                        | 99                                             | 99/1.0                                                              | 100                                                        | Clade                        | 96                     | 100                      |
| Achat'ceae sister to Amar'ceae                              | NA                                        | NA                                             | NA                                                                  | 84                                                         | Yes                          | 86                     | 91                       |
| <i>Caryophyllaceae</i>                                      | Singleton                                 | Singleton                                      | Singleton                                                           | Singleton                                                  | Clade                        | 90                     | 98                       |
| Car'ales clade D                                            | <50                                       | 96                                             | 99/1.0                                                              | Not found                                                  | Clade                        | 75                     | 99                       |
| <i>Aizoaceae</i> *                                          | Not found                                 | 93                                             | Singleton                                                           | Singleton                                                  | Grade                        | <20                    | 25                       |
| <i>Nyctaginaceae</i>                                        | 99                                        | 100                                            | 100/1.0                                                             | 96                                                         | Clade                        | 89                     | 100                      |
| <i>Phytolaccaceae</i>                                       | 89                                        | 77                                             | Not found                                                           | 65                                                         | Grade                        | <20                    | 21                       |
| <i>Gisekiaceae</i>                                          | NA                                        | NA                                             | NA                                                                  | Singleton                                                  | Singleton                    | —                      | —                        |
| <i>Phytolaccaceae</i> sensu APW                             | NA                                        | NA                                             | NA                                                                  | Not found                                                  | Grade                        | <20                    | <20                      |
| <i>Sarcobatus</i>                                           | NA                                        | NA                                             | NA                                                                  | Singleton                                                  | Clade                        | 100                    | 100                      |
| Nyct'ceae-Phyt'ceae- <i>Sarcobatus</i> clade                | (85)                                      | (65)                                           | (99/1.0)                                                            | Not found                                                  | Yes                          | 71                     | 87                       |
| <i>Barbeuiaceae</i> (no <i>rbcl</i> data available)         | NA                                        | NA                                             | NA                                                                  | Singleton                                                  | NA                           | NA                     | NA                       |
| Car'ales clade E ("higher core I", sensu Hilu et al., 2003) | 98                                        | 100                                            | NA                                                                  | 91                                                         | Clade                        | 49                     | 85                       |
| <i>Basellaceae</i>                                          | NA                                        | NA                                             | NA                                                                  | 100                                                        | Clade                        | 100                    | 100                      |
| <i>Cactaceae</i>                                            | Singleton                                 | Singleton                                      | Singleton                                                           | 100                                                        | Clade                        | 81                     | 100                      |
| <i>Portulacaceae</i> (sensu APG II)                         | Singleton                                 | Singleton                                      | Singleton                                                           | Not found                                                  | Grade                        | <20                    | <20                      |
| Cact.-Port. clade                                           | 94                                        | 100                                            | 100/1.0                                                             | Not found                                                  | Pro parte                    | <20                    | 59                       |
| <i>Didiereaceae</i>                                         | NA                                        | NA                                             | NA                                                                  | 100                                                        | Singleton                    | —                      | —                        |
| Did'ceae sister to Cact.-Port. clade                        | NA                                        | NA                                             | NA                                                                  | Not found                                                  | No                           | <20                    | 48                       |
| <i>Halophytum</i>                                           | NA                                        | NA                                             | NA                                                                  | Singleton                                                  | Singleton                    | —                      | —                        |
| <i>Halophytum</i> sister to Did.-Cact.-Port. clade          | NA                                        | NA                                             | NA                                                                  | <50                                                        | No                           | <20                    | 42                       |
| 'succulent' clade F ("higher core II")                      | NA                                        | NA                                             | NA                                                                  | 100                                                        | Clade                        | 40                     | 40                       |
| <i>Molluginaceae</i> †                                      | NA                                        | Not found                                      | Singleton                                                           | NA                                                         | Diphyletic                   | <20                    | 36                       |
| Moll.-E-F clade                                             | <50                                       | 85                                             | 100/1.0                                                             | NA                                                         | Yes                          | 66                     | 100                      |
| <i>Stegnosperma</i>                                         | NA                                        | NA                                             | NA                                                                  | NA                                                         | Singleton                    | —                      | —                        |
| <i>Stegnosperma</i> sister to Moll.-E-F clade               | NA                                        | NA                                             | NA                                                                  | NA                                                         | Yes                          | 97                     | 100                      |
| core Caryophyllales (APW)                                   | 94                                        | 100                                            | 100/1.0                                                             | NA                                                         | Clade                        | 98                     | 100                      |
| clade C sister to core Car'ales                             | 99                                        | 98                                             | 100                                                                 | Not found                                                  | Yes                          | 92                     | 100                      |
| <i>Simmondsia</i>                                           | Singleton                                 | Singleton                                      | NA                                                                  | Singleton                                                  | Singleton                    | —                      | —                        |
| <i>Simmondsia</i> sister to {clade C + core Car'ales}       | <50                                       | 73                                             | NA                                                                  | Unresolved                                                 | Yes                          | 65                     | 100                      |
| Misplaced <i>rbcl</i> accession & taxa                      | AizCa_AJ235778 ( <i>Delosperma</i> )      |                                                |                                                                     | Nested within Nyct.-Phyt.- <i>Sarcobatus</i> clade         |                              |                        |                          |
|                                                             | PgnCa_M77702 (misabeled)                  |                                                |                                                                     | → <i>Plumbaginaceae</i> (database error; see PImCa_M77701) |                              |                        |                          |
|                                                             | PImCa_M77701 (misabeled)                  |                                                |                                                                     | → <i>Polygonaceae</i> (database error; see PgnCa_M77702)   |                              |                        |                          |

\* Including accession of *Corbichonia* (sister to *Lophiocarpus*, no *rbcl* data; *Lophiocarpaceae* [APW])

† Including accession of *Limeum* (monogeneric *Limeaceae* [APW])

**Asterids: Cornales**

|                                                     | Savolainen et al., 2000, <i>rbcl</i> | Hilu & al., 2003; <i>matK</i> | Sollis & al., 2000, 2007; 3 genes incl. <i>rbcl</i> , <i>P-BS/PP</i> | Sollis & al., 2003; 4 genes incl. <i>rbcl</i> | Best ML tree EUDIS matrix | CA-BS <sup>EUDIS</sup> | GRTS-ML <sup>EUDIS</sup> |
|-----------------------------------------------------|--------------------------------------|-------------------------------|----------------------------------------------------------------------|-----------------------------------------------|---------------------------|------------------------|--------------------------|
| <b>Cornaceae</b> [excl. <i>Mastixia</i> accessions] | <b>59</b>                            | Singleton                     | <b>93/1.0</b>                                                        | <b>100</b>                                    | Clade                     | <20[72]                | <b>88</b>                |
| <b>Nyssaceae</b>                                    | Singleton                            | Singleton                     | <b>99/1.0</b>                                                        | NA                                            | Clade                     | <b>84</b>              | 45                       |
| <b>Cornaceae s.l. (APG II)</b>                      | <50                                  | Not found                     | Not found                                                            | NA                                            | Clade                     | <20                    | <20                      |
| <b>Hydrangeaceae</b>                                | <b>95</b>                            | <b>87</b>                     | Not found                                                            | Singleton                                     | Grade                     | <20                    | <b>64</b>                |
| <b>Hydrostachys</b>                                 | NA                                   | NA                            | Singleton                                                            | NA                                            | Clade                     | <b>100</b>             | <b>100</b>               |
| <b>Loasaceae</b>                                    | NA                                   | <b>99</b>                     | <b>98/1.0</b>                                                        | Singleton                                     | Clade                     | <b>98</b>              | <b>100</b>               |
| Hydran'ceae- <i>Hydrost.</i> -Loasaceae clade       | NA                                   | <b>100</b>                    | <b>91/1.0</b>                                                        | (94)                                          | Yes                       | <b>86</b>              | <b>95</b>                |
| Corn. s.l.-{Hydran.- <i>Hydrost.</i> -Loas.} clade  | NA                                   | NA                            | NA                                                                   | (100)                                         | No                        | 26                     | 38                       |
| <b>Curtisia</b>                                     | NA                                   | NA                            | NA                                                                   | NA                                            | Singleton                 | —                      | —                        |
| <b>Grubbia</b>                                      | NA                                   | NA                            | NA                                                                   | NA                                            | Singleton                 | —                      | —                        |

**Misplaced *rbcl* accession & taxa** CrnCo\_AF384109 & CrnCo\_AF384107 (*Mastixia*) Placed as sister to Nyssaceae (CA-BS=66)  
 NysCo\_AF119178 (mislabelled) Unknown affinity; best supported bipartion NysCo\_AF119178 + OnaMy\_AY841634 (ambiguous *rbcl*) | all others

**Asterids: Ericales**

|                                                                              | Hilu et al. 2003, fig. 11; <i>matK</i> | Schönenberger et al., 2006; multigene | Best ML tree EUDIS matrix | CA-BS <sup>EUDIS</sup> | GRTS-ML <sup>EUDIS</sup> |
|------------------------------------------------------------------------------|----------------------------------------|---------------------------------------|---------------------------|------------------------|--------------------------|
| <b>Actinidiaceae</b>                                                         | Singleton                              | Singleton                             | Clade                     | <b>99</b>              | <b>100</b>               |
| <b>Roridula</b>                                                              | NA                                     | Singleton                             | Singleton                 | —                      | —                        |
| <b>Sarraceniaceae</b>                                                        | Singleton                              | <b>100/1.0</b>                        | Clade                     | <b>68</b>              | <b>95</b>                |
| <i>Roridula</i> sister to Actin'ceae (as in APW)                             | NA                                     | <b>100/1.0</b>                        | Yes                       | 21                     | <50                      |
| <i>Roridula</i> sister to Sarr'ceae                                          | NA                                     | Not found                             | No                        | <b>70</b>              | <b>73</b>                |
| Act'ceae- <i>Rorid.</i> -Sarr'ceae clade                                     | Not found                              | <b>76/1.0</b>                         | Yes                       | 34                     | 24                       |
| <b>Clethraceae</b>                                                           | NA                                     | Singleton                             | Clade                     | <b>96</b>              | <b>100</b>               |
| <b>Cyrtillaceae</b>                                                          | NA                                     | Singleton                             | Grade                     | <20                    | 41                       |
| <b>Ericaceae</b>                                                             | <b>100</b>                             | <b>98/1.0</b>                         | Clade                     | <b>85</b>              | <b>98</b>                |
| Cyr'ceae sister to Ericaceae                                                 | NA                                     | <b>98/1.0</b>                         | No                        | <20                    | <20                      |
| Clethr.-Cyr.-Ericaceae clade                                                 | NA                                     | <b>98/1.0</b>                         | No                        | <20                    | <20                      |
| ARS-CCE clade                                                                | Not found                              | <b>100/1.0</b>                        | Yes                       | 27                     | <b>57</b>                |
| <b>Diapensiaceae</b>                                                         | <b>99</b>                              | <b>100/1.0</b>                        | Clade                     | <b>92</b>              | <b>100</b>               |
| <b>Styracaceae</b>                                                           | <b>76</b>                              | <b>99/1.0</b>                         | Clade                     | <b>81</b>              | <b>92</b>                |
| Diap'ceae sister to Styr'ceae                                                | <b>58</b>                              | <b>98/1.0</b>                         | Yes                       | 34                     | <b>50</b>                |
| <b>Symplocos</b>                                                             | NA                                     | <b>100/1.0</b>                        | Clade                     | <b>100</b>             | <b>100</b>               |
| <i>Symplocos</i> sister to Diap.-Styr. clade                                 | NA                                     | <b>100/1.0</b>                        | No                        | <20                    | <20                      |
| <b>Mitrastemona</b>                                                          | NA                                     | NA                                    | NA                        | NA                     | NA                       |
| <b>Theaceae</b>                                                              | Singleton                              | <b>100/1.0</b>                        | Clade                     | <b>94</b>              | <b>100</b>               |
| <b>Ericales clade A</b>                                                      | Not found                              | <b>NA/1.0</b>                         | No                        | <20                    | <20                      |
| <b>Ebenaceae</b>                                                             | Singleton                              | <b>100/1.0</b>                        | Clade                     | <b>86</b>              | <b>69</b>                |
| <b>Maesa</b>                                                                 | NA                                     | Singleton                             | Clade                     | <b>100</b>             | <b>100</b>               |
| <b>Myrsinaceae</b>                                                           | NA                                     | <b>100/1.0</b>                        | Clade                     | <b>94</b>              | <b>93</b>                |
| <b>Primulaceae</b>                                                           | <b>100</b>                             | Singleton                             | Clade                     | <b>77</b>              | <b>97</b>                |
| Myrs'ceae sister to Prim'ceae                                                | NA                                     | <b>100/1.0</b>                        | Yes                       | <b>99</b>              | <b>92</b>                |
| <i>Maesa</i> sister to Myrs.-Prim. clade <sup>§</sup>                        | NA                                     | Not found                             | Yes                       | <b>50</b>              | <b>60</b>                |
| <b>Theophrastaceae</b>                                                       | NA                                     | <b>90/1.0</b>                         | Clade                     | <b>77</b>              | <b>98</b>                |
| Theoph'ceae sister to Myrs.-Prim. clade                                      | NA                                     | <b>100/1.0</b>                        | No                        | 43                     | 31                       |
| Theoph'ceae-MMP clade                                                        | NA                                     | <b>100/1.0</b>                        | Yes                       | <b>100</b>             | <b>93</b>                |
| Ebenaceae sister to MMPT clade                                               | Not found                              | <b>90/1.0</b>                         | Yes                       | 27                     | <b>93</b>                |
| <b>Sapotaceae</b>                                                            | NA                                     | <b>100/1.0</b>                        | Clade                     | <b>82</b>              | <b>98</b>                |
| <b>Ericales clade B</b>                                                      | Not found                              | <b>NA/1.0</b>                         | No                        | <20                    | <20                      |
| <b>Pentaphylacaceae</b> †                                                    | NA                                     | Singleton                             | Singleton                 | —                      | —                        |
| <b>Sladeniaceae</b>                                                          | NA                                     | NA                                    | Diphyletic                | <20                    | 33                       |
| <b>Ternstroemiaceae</b>                                                      | NA                                     | <b>100/1.0</b>                        | Grade                     | 30                     | <b>69</b>                |
| Pent'ceae sister to Slad'ceae                                                | NA                                     | Not found                             | No                        | 29                     | 29                       |
| Pent'ceae sister to Tern'ceae                                                | NA                                     | <b>100/1.0</b>                        | Clade                     | <20                    | <20                      |
| <b>Pentaphylacaceae [APG]</b>                                                | NA                                     | <b>65/1.0</b>                         | No                        | <20                    | <20                      |
| <b>core Ericales</b>                                                         | Not found                              | <b>NA/1.0</b>                         | No                        | <20                    | <20                      |
| <b>Lecythidaceae</b>                                                         | NA                                     | <b>100/1.0</b>                        | Clade                     | <b>97</b>              | <b>100</b>               |
| <b>Polemoniaceae</b>                                                         | <b>100</b>                             | <b>100/1.0</b>                        | Clade                     | <b>100</b>             | <b>96</b>                |
| <b>Fouquieria</b>                                                            | Singleton                              | <b>100/1.0</b>                        | Clade                     | <b>100</b>             | <b>100</b>               |
| <i>Fouquieria</i> sister to Pol'ceae                                         | <50                                    | <b>100/1.0</b>                        | No                        | <20                    | <20                      |
| <b>Expanded core Ericales incl. Lecy'ceae, Polem'ceae, <i>Fouquieria</i></b> | Not found                              | <b>100/1.0</b>                        | Yes                       | 40                     | <b>60</b>                |
| <b>Balsaminaceae</b>                                                         | Singleton                              | Singleton                             | Clade                     | <b>100</b>             | <b>100</b>               |
| <b>Marcgraviaceae</b>                                                        | NA                                     | <b>99/1.0</b>                         | Clade                     | <b>92</b>              | <b>100</b>               |
| <b>Pelliciera</b>                                                            | NA                                     | Singleton                             | Clade                     | <b>100</b>             | <b>100</b>               |
| <b>Tetrameristaceae</b>                                                      | NA                                     | <b>100/1.0</b>                        | Clade                     | <b>92</b>              | <b>100</b>               |
| <b>Tetrameristaceae sensu APW</b>                                            | NA                                     | <b>100/1.0</b>                        | Clade                     | <b>93</b>              | <b>100</b>               |
| Bals'ceae sister to Marc'ceae (following APG II)                             | NA                                     | NA                                    | Yes                       | <b>63</b>              | <b>50</b> !!!            |
| Marc'ceae sister to { <i>Pell.</i> -Tetr'ceae} (following APW)               | NA                                     | NA                                    | No                        | 21                     | <b>50</b> !!!            |
| Bals'ceae-Marc'ceae-Tetr'ceae clade                                          | Not found                              | <b>100/1.0</b>                        | Yes                       | <b>100</b>             | <b>100</b>               |

Triangle case #2: Balanced

**Misplaced *rbcl* accession & taxa** EbeEr\_AJ402968 → Eurosid II: Sapindales: Rutaceae  
 MsnEr\_L12598 (mislabelled) → Ericaceae  
 PplEr\_AJ402986, Savolainen et al. 2000, Ambiguous; as sister to all asterids (incl. misplaced rosids; CA-BS=28) or sister to misplaced OnaMy\_AY841634 (CA-BS=21) etc.  
 PplEr\_AJ428891 Bremer et al., 2002 [= Ppl\_0 in GRTS replicates] Exact duplicate of PplEr\_AJ428893 (same authors)  
 TstEr\_AY380342 (*Archytaea*) Sister to Malpighiales: *Bonnetia* (CA-BS=53)

<sup>§</sup> APW sees Theoph'ceae as sister to Myrs.-Prim. clade  
<sup>†</sup> PplEr\_AF419239, And.&al. 2002 [= Ppl\_1 in GRTS replicates]

|                                                                   | Savolainen et al., 2000; <i>rbcl</i> | Hilu & al., 2003; <i>matK</i> | Soltis & al., 2000, 2007; 3 genes, P-BS/PP | Soltis & al., 2003; 4 genes | Best ML tree EUDIS matrix | CA-BS <sub>EUDIS</sub> | GRTS-ML <sub>EUDIS</sub> |
|-------------------------------------------------------------------|--------------------------------------|-------------------------------|--------------------------------------------|-----------------------------|---------------------------|------------------------|--------------------------|
| <b>Ranunculales</b>                                               |                                      |                               |                                            |                             |                           |                        |                          |
| <i>Berberidaceae</i>                                              | 96                                   | Yes                           | 100/1.0                                    | 100                         | Clade                     | 98                     | 73                       |
| <i>Ranunculaceae</i>                                              | 90                                   | Yes                           | 90/1.0                                     | 100                         | Clade                     | 93                     | 92                       |
| Berb'ceae sister to Ranun'ceae                                    | 52                                   | Yes                           | 92/1.0                                     | 87                          | Yes                       | 82                     | 69                       |
| <i>Menispermaceae</i>                                             | Singleton                            | Yes                           | 100/1.0                                    | 100                         | Clade                     | 98                     | 80                       |
| Menisp'ceae sister to Berb.-Ranun. clade                          | 56                                   | Yes                           | 70/0.93                                    | 96                          | No                        | 32                     | 49                       |
| <i>Circaeaster</i> + <i>Kingdonia</i> ( <i>Circaeasteraceae</i> ) | NA                                   | NA                            | 100/1.0                                    | 100                         | Yes                       | 99                     | 100                      |
| <i>Lardizabalaceae</i>                                            | Singleton                            | Singleton                     | 100/1.0                                    | 100                         | Clade                     | 100                    | 100                      |
| Circ'ceae sister to Lard'ceae                                     | NA                                   | NA                            | <50/0.75                                   | 71                          | No                        | 41                     | 66                       |
| Core Ranunculales                                                 | <50                                  | Yes                           | 99/1.0                                     | 97                          | Clade                     | 56                     | 86                       |
| <i>Euptelea</i> sister to core Ran'ales                           | Not found                            | No                            | 53/0.95                                    | 78                          | Yes                       | 70                     | 100                      |
| <i>Fumariaceae</i>                                                | NA                                   | NA                            | Singleton                                  | Singleton                   | Clade                     | 67                     | 92                       |
| <i>Papaveraceae</i>                                               | Singleton                            | NA                            | Singleton                                  | Singleton                   | Clade                     | 37                     | 56                       |
| <i>Pteridophyllum</i>                                             | NA                                   | NA                            | Singleton                                  | Singleton                   | Singleton                 | —                      | —                        |
| <i>Papaveraceae s.l.</i> (APG II, APW)                            | NA                                   | Singleton                     | 100/1.0                                    | 100                         | Clade                     | 78                     | 80                       |

Misplaced *rbcl* accession & taxa BerRa\_AF203487 (misplaced) → Ambiguous; groups with mislabeled EmbBr\_AJ402949 and ComMy\_AF281478  
 MspRa\_D85696 (misplaced) → Ran'ceae  
 PpvRa\_AY328195 (*Hainania*) → Eurosids II: Malvales: Malvaceae  
 PpvRa\_AF523842 (*Oceanopapaver*) → Eurosids II: Malvales: Malvaceae  
 RanRa\_AF093729 (*Placospermum*) → Proteales: Proteaceae  
 RanRa\_DQ006121 (misplaced) → Eurosids I: Rosales: Rosaceae

|                                                              | Savolainen et al., 2000 | Hilu & al., 2003 | Soltis & al., 2000, 2007 | Soltis & al., 2003 | Best ML tree EUDIS matrix | CA-BS <sub>EUDIS</sub> | GRTS-ML <sub>EUDIS</sub> |
|--------------------------------------------------------------|-------------------------|------------------|--------------------------|--------------------|---------------------------|------------------------|--------------------------|
| <b>Santalales</b>                                            |                         |                  |                          |                    |                           |                        |                          |
| <i>Loranthaceae</i>                                          | NA                      | NA               | NA                       | NA                 | Clade                     | 100                    | 100                      |
| <i>Misodendron</i> + <i>Schoepfia</i>                        | NA                      | NA               | Singleton                | Singleton          | Yes                       | 80                     | 100                      |
| Lor'ceae-Misod.- <i>Schoepfia</i> clade                      | NA                      | NA               | NA                       | NA                 | Yes                       | 64                     | 99                       |
| <i>Opiliaceae</i>                                            | Singleton               | Singleton        | Singleton                | Singleton          | Singleton                 | —                      | —                        |
| <i>Santalaceae</i> (incl./excl. SanSI_AJ235797) <sup>§</sup> | <50                     | 100              | 99/1.0                   | 93                 | Clade <sup>§</sup>        | <20/50                 | 64                       |
| <i>Olacaceae</i>                                             | Singleton               | Not found        | NA                       | NA                 | Singleton                 | —                      | —                        |
| Olacaceae sister to other Santalales                         | 92                      | 100              | NA                       | NA                 | Yes                       | 99                     | 100                      |

<sup>§</sup> SanSI\_AJ235797 (*Thesium*) stays with *Opilia*, either in a *Opilia*-Sant'ceae p.p. clade (CA-BS=33) or *Opilia*-LMS clade (CA-BS=31), or placed as sister to Lor'ceae

|                                                                 | Savolainen et al., 2000; <i>rbcl</i> | Soltis & al., 2000, 2007 | Best ML tree EUDIS matrix | CA-BS <sub>EUDIS</sub> | GRTS-ML <sub>EUDIS</sub> |
|-----------------------------------------------------------------|--------------------------------------|--------------------------|---------------------------|------------------------|--------------------------|
| <b>Saxifragales</b>                                             |                                      |                          |                           |                        |                          |
| <i>Aphanopetalum</i>                                            | NA                                   | NA                       | Singleton                 | —                      | —                        |
| <i>Haloragaceae</i>                                             | 87                                   | 100/1.0                  | Clade                     | 100                    | 100                      |
| <i>Penthoraceae</i>                                             | Singleton                            | Singleton                | Clade                     | 100                    | 100                      |
| Hal'ceae sister to Penth'ceae                                   | <50                                  | 97/1.0                   | Yes                       | 92                     | 100                      |
| <i>Tetracarpaeaceae</i>                                         | NA                                   | Singleton                | Singleton                 | —                      | —                        |
| <i>Haloragaceae s.l.</i> (APG II)                               | NA                                   | 100/1.0                  | Clade                     | 94                     | 100                      |
| <i>Aphanopetalum</i> sister to Hal'ceae <i>s.l.</i>             | NA                                   | NA                       | Yes                       | 92                     | 100                      |
| <i>Crassulaceae</i>                                             | 100                                  | 100/1.0                  | Clade                     | 100                    | 100                      |
| Aph.-Hal.-Crass. clade                                          | 55                                   | 99/1.0                   | Yes                       | 84                     | 90                       |
| <i>Paeoniaceae</i>                                              | Singleton                            | Singleton                | Clade                     | 100                    | 100                      |
| Paeoniaceae sister to (A)HC clade                               | Not found                            | Not found                | No                        | <20                    | <20                      |
| <i>Ribes</i> ( <i>Grossulariaceae</i> ) <sup>†</sup>            | Singleton                            | Singleton                | Singleton                 | —                      | —                        |
| <i>Iteaceae</i>                                                 | Singleton                            | Singleton                | Clade                     | 94                     | 100                      |
| <i>Pterostemonaceae</i>                                         | Singleton                            | Singleton                | Singleton                 | —                      | —                        |
| <i>Iteaceae s.l.</i> (APG II)                                   | 96                                   | 100/1.0                  | Clade                     | 92                     | 100                      |
| <i>Saxifragaceae</i>                                            | 65                                   | 100/1.0                  | Clade                     | 84                     | 96                       |
| <i>Iteaceae s.l.</i> sister to Sax'ceae                         | <50                                  | 100/1.0                  | Yes                       | 42                     | 78                       |
| <i>Iteaceae s.l.</i> -Gross.-Sax. clade                         | Not found                            | <50/1.0                  | Yes                       | 42                     | NA <sup>†</sup>          |
| core Saxifragales                                               | <50                                  | 64/0.6                   | Clade                     | <20                    | <20                      |
| <i>Cercidiphyllum</i>                                           | Singleton                            | Singleton                | Singleton                 | —                      | —                        |
| <i>Cercid.</i> sister to core Sax'ales                          | <50                                  | <50/0.59                 | Yes                       | <20                    | <20                      |
| <i>Altingiaceae</i> ( <i>Altingia</i> , <i>Liquidambar</i> )    | 100                                  | 100/1.0                  | Clade                     | 100                    | 94                       |
| Alt'ceae-Cercid.-core Sax'ales clade                            | Not found                            | <50/0.83                 | Yes                       | <20                    | <20                      |
| <i>Daphniphyllum</i>                                            | Singleton                            | Singleton                | Clade                     | 100                    | 100                      |
| <i>Hamamelidaceae</i>                                           | 79                                   | 58/0.99                  | Grade                     | <20                    | 49                       |
| <i>Peridiscaceae</i> (2 different <i>rbcl</i> sequences)        | NA                                   | NA                       | No                        | <5                     | <5                       |
| <i>Peridiscus lucidus</i> (PdsSf_AY380356) sister to Daphn'ceae | NA                                   | NA                       | Yes                       | 39                     | 96                       |
| <i>Peridiscus lucidus</i> (PdsSf_AY380356) sister to Ham'ceae   | NA                                   | NA                       | No                        | <20                    | <5                       |
| <i>Daphniph.</i> -Ham'ceae- <i>Peridiscus</i> clade             | NA                                   | Not found                | No                        | <20                    | 21                       |

Misplaced *rbcl* accession & taxa GroSf\_AF299092/GroSf\_X87394 (*Quintinia*) → A subclade of "asterid clade"; misplaced in NCBI TaxTree (member of euasterid II)  
 PdsSf\_AJ403018 (*Whittonia*) → Sister to Malpighiaceae (Eurosids I: Malpighiales; GRTS-ML<sub>EUDIS</sub>=77)  
 SaxSf\_AF206766 (*Fendlera*) → Asterids: Cornales: Hydrangeaceae

<sup>†</sup>Note: In our original data set (and analyses) *Ribes* and *Quintinia* were included in the Gross'ceae

| Node description/ taxonomic unit                   | best ML tree, EURO1/EURO2 matrix | CA-BS <sub>EURO12</sub> | GRTS-ML <sub>EURO12</sub> | best ML tree, ROSID matrix | CA-BS <sub>ROSID</sub> | GRTS-ML <sub>ROSID</sub> | Wang & al., 2009; 36 genes incl. rbcL | best ML tree, EUDIS matrix | CA-BS <sub>EUDIS</sub> | GRTS-ML <sub>EUDIS</sub> | Savolainen et al., 2000; rbcL, P-JK | Hilu & al., 2003; matK, P-JK | Solits & al., 2000, 2007; 3 genes, P-JK/PP | Solits & al., 2003; 4 genes, P-JK |
|----------------------------------------------------|----------------------------------|-------------------------|---------------------------|----------------------------|------------------------|--------------------------|---------------------------------------|----------------------------|------------------------|--------------------------|-------------------------------------|------------------------------|--------------------------------------------|-----------------------------------|
| <b>Ranunculales</b>                                | NA                               | NA                      | NA                        | NA                         | NA                     | NA                       | NA                                    | Clade                      | 88                     | 72                       | 51                                  | 90                           | 98/1.0                                     | 100                               |
| <b>Sabiales: Sabiaceae</b>                         | NA                               | NA                      | NA                        | NA                         | NA                     | NA                       | NA                                    | Clade                      | 98                     | 100                      | Singleton                           | Singleton                    | <sup>[2]</sup> 100/1.0                     | <sup>[2]</sup> 100                |
| <b>Proteales</b>                                   | NA                               | NA                      | NA                        | NA                         | NA                     | NA                       | NA                                    | Diphyletic <sup>†</sup>    | <20                    | <20                      | <50                                 | <sup>[2]</sup> 64            | 84/1.0                                     | 73                                |
| <i>Nelumbo</i>                                     | NA                               | NA                      | NA                        | NA                         | NA                     | NA                       | NA                                    | Grade                      | 23                     | 100                      | Singleton                           | Singleton                    | Singleton                                  | Singleton                         |
| <i>Platanus</i>                                    | NA                               | NA                      | NA                        | NA                         | NA                     | NA                       | Singleton                             | Clade                      | 100                    | 66                       | Singleton                           | Singleton                    | Singleton                                  | Singleton                         |
| <b>Proteaceae</b>                                  | NA                               | NA                      | NA                        | NA                         | NA                     | NA                       | NA                                    | Clade                      | 93                     | 96                       | <sup>[3]</sup> 100                  | <sup>[2]</sup> 100           | <sup>[2]</sup> 100/1.0                     | Singleton                         |
| <i>Platanus</i> sister to Proteaceae               | NA                               | NA                      | NA                        | NA                         | NA                     | NA                       | NA                                    | Yes                        | 57                     | 43 <sup>#</sup>          | Not found                           | 94                           | 93/1.0                                     | Not found                         |
| <b>Trochodendraceae<sup>§</sup></b>                | NA                               | NA                      | NA                        | NA                         | NA                     | NA                       | Singleton                             | Clade                      | 100 <sup>§</sup>       | (100) <sup>§</sup>       | <sup>[2]</sup> 100                  | <sup>[2]</sup> 100           | <sup>[2]</sup> 100/1.0                     | <sup>[2]</sup> 100                |
| <b>Buxales</b>                                     | NA                               | NA                      | NA                        | NA                         | NA                     | NA                       | NA                                    | Clade                      | 81                     | 100                      | <sup>[2]</sup> 94                   | <sup>[3]</sup> 100           | <sup>[3]</sup> 100/1.0                     | <sup>[3]</sup> 100                |
| <i>Didymelea</i> sister to <b>Buxaceae</b>         | NA                               | NA                      | NA                        | NA                         | NA                     | NA                       | NA                                    | Yes                        | 99                     | 100                      | 84                                  | Not found                    | 100/1.0                                    | 99                                |
| Core eudicots forming clade                        | NA                               | NA                      | NA                        | NA                         | NA                     | NA                       | 100                                   | Yes                        | 23                     | <20                      | <50                                 | 99                           | 100/1.0                                    | 100                               |
| <b>Gunnerales: Gunneraceae</b>                     | NA                               | NA                      | NA                        | NA                         | NA                     | NA                       | Singleton                             | Clade                      | 88                     | 100                      | 57                                  | <sup>[2]</sup> 100           | <sup>[2]</sup> 75/1.0                      | 85                                |
| Gunn'ales sister to core eudicots                  | NA                               | NA                      | NA                        | NA                         | NA                     | NA                       | 100                                   | Yes                        | <20                    | <20                      | <50                                 | <50                          | <50/0.98                                   | 84                                |
| <b>Berberidopsis</b> sister to <b>Aextoxiclon</b>  | NA                               | NA                      | NA                        | NA                         | NA                     | NA                       | NA                                    | Yes                        | 70                     | 100                      | <sup>[2]</sup> <50                  | <sup>[2]</sup> 100           | <sup>[2]</sup> 100/1.0                     | 100                               |
| <b>Caryophyllales</b>                              | NA                               | NA                      | NA                        | NA                         | NA                     | NA                       | <sup>[2]</sup> 100                    | Clade                      | 93                     | 100                      | 84                                  | 99                           | <sup>[24]</sup> 100/1.0                    | 100                               |
| <i>Rhabdodendron</i> sister to rem. Caryophyllales | NA                               | NA                      | NA                        | NA                         | NA                     | NA                       | NA                                    | Yes                        | 77                     | 100                      | Not found                           | Not found                    | 86/0.99                                    | NA                                |
| <b>Dilleniaceae</b>                                | NA                               | NA                      | NA                        | NA                         | NA                     | NA                       | NA                                    | Clade                      | 99                     | 92                       | <sup>[3]</sup> 96                   | Singleton                    | <sup>[2]</sup> 100/1.0                     | Singleton                         |
| Dill'ceae sister to Cary'ales                      | NA                               | NA                      | NA                        | NA                         | NA                     | NA                       | NA                                    | No                         | <20                    | <20                      | <50                                 | Not found                    | 60/1.0                                     | 83                                |
| <b>Santalales</b>                                  | NA                               | NA                      | NA                        | NA                         | NA                     | NA                       | NA                                    | Clade                      | 64                     | 100                      | <sup>[2]</sup> <50                  | <sup>[5]</sup> 99            | <sup>[5]</sup> 100/1.0                     | <sup>[5]</sup> 100                |
| Olaaceae sister to other Santalales                | NA                               | NA                      | NA                        | NA                         | NA                     | NA                       | NA                                    | Yes                        | 99                     | 100                      | 92                                  | 100                          | NA                                         | NA                                |
| <b>Saxifragales</b>                                | NA                               | NA                      | NA                        | NA                         | NA                     | NA                       | <sup>[4]</sup> 100                    | Clade                      | 37                     | <20/31 <sup>†</sup>      | <50                                 | 62                           | <sup>[25]</sup> 98/1.0                     | 100                               |
| <i>Daphniophyllum</i> sister to other Sax'ales     | NA                               | NA                      | NA                        | NA                         | NA                     | NA                       | NA                                    | No                         | <20                    | <20/ <sup>†</sup> <20    | <50                                 | Not found                    | <50/Not found                              | <50                               |
| Saxifragales sister to Vitales + rosids            | NA                               | NA                      | NA                        | NA                         | NA                     | NA                       | 100                                   | No                         | <20                    | <20/ <sup>†</sup> <20    | Not found                           | Not found                    | 99/1.0                                     | Not found                         |
| <b>Vitales: Vitaceae</b>                           | NA                               | NA                      | NA                        | Clade                      | 100                    | 100                      | <sup>[2]</sup> 100                    | Clade                      | 100                    | 100                      | 86                                  | Singleton                    | <sup>[2]</sup> 100/1.0                     | <sup>[2]</sup> 100                |
| Vitales sister to rosids <sup>#</sup>              | NA                               | NA                      | NA                        | Yes                        | <20 <sup>#</sup>       | 34 <sup>#</sup>          | 72                                    | Yes                        | <20                    | 37                       | Not found                           | Not found                    | 73/1.0                                     | Not found                         |

<sup>§</sup> The second sequence of this family (TrdT\_L01958; *Trochodendron*) was filtered by the program as an exact duplicate of PlaPr\_L01943, a mislabeled Proteales: *Platanus* sequence. Value is based on experiments using relabeled (subset of EUDIS) input matrices

<sup>†</sup> Including or excluding TU "Grossulariaceae" (=GroSf, comprising *Ribes*, *Grossularia*), which induce phylogenetic interference (two out of three sequences are not Saxifragales rbcL)

<sup>‡</sup> Under the assumption that the eudicot root is placed between Ranunculales and other groups.

<sup>#</sup> Assuming mislabeled *Emblingia* accession EmbBr\_AJ402949 [= Emb\_0 in GRTS replicates] and others represent non-rosid (outgroup) taxa/rbcL sequences.

| Rosid clade (excluding Saxifragales) <sup>‡</sup>     | NA                | NA  | NA  | Yes   | NA  | NA  | 100                 | Yes        | 32 <sup>‡</sup>     | 46  | <50                 | 95                 | 99/0.99                 | 79                 |
|-------------------------------------------------------|-------------------|-----|-----|-------|-----|-----|---------------------|------------|---------------------|-----|---------------------|--------------------|-------------------------|--------------------|
| Fabidae (syn. Eurosids I) forming clade <sup>††</sup> | Yes <sup>††</sup> | NA  | NA  | Yes   | 37  | 63  | 100                 | Yes        | 47 <sup>‡</sup>     | 48  | <50                 | 52                 | 77/1.0                  | <50                |
| <b>Celastrales<sup>‡</sup></b>                        | Yes               | 81  | 74  | Yes   | 68  | 91  | <sup>[4]</sup> 100  | Clade      | 32/69 <sup>‡</sup>  | 83  | <sup>[8]</sup> 99   | <sup>[3]</sup> 100 | <sup>[8]</sup> 62/1.0   | <sup>[5]</sup> 100 |
| <b>Huaceae (fam. inc. sedis)</b>                      | Clade             | 100 | 100 | Clade | 100 | 100 | Singleton           | Clade      | 100                 | 100 | Singleton           | NA                 | Singleton               | Singleton          |
| <b>Malpighiales<sup>†</sup></b>                       | Yes               | 82  | 74  | Yes   | 88  | 88  | <sup>[19]</sup> 100 | Clade      | 86                  | 69  | <sup>[19]</sup> <50 | <sup>[12]</sup> 71 | <sup>[14]</sup> 99/1.0  | <sup>[18]</sup> 95 |
| <b>Oxalidales</b>                                     | Yes               | 81  | <20 | Yes   | 91  | 96  | <sup>[6]</sup> 100  | Clade      | 89                  | 99  | <sup>[5]</sup> 93   | <sup>[2]</sup> 100 | <sup>[9]</sup> 100/1.0  | <sup>[5]</sup> 100 |
| CHMO clade                                            | Yes               | 54  | 60  | Yes   | 23  | 92  | 100                 | Yes        | 32 <sup>‡</sup>     | 76  | <50                 | 60                 | 51/1.0                  | <50                |
| Celastrales sister to Malpighiales                    | No                | <20 | <20 | No    | <20 | 87  | Not found           | Yes        | <20                 | 75  | Not found           | <50                | <50/0.54                | Not found          |
| Celastrales sister to Huaceae                         | No                | <20 | <20 | No    | <20 | <20 | <50                 | No         | <20                 | <20 | <50                 | NA                 | 62/n.f.                 | Not found          |
| Huaceae sister to Oxalidales                          | No                | <20 | <20 | No    | <20 | 62  | Not found           | Unresolved | <20                 | 68  | Not found           | NA                 | N.f./0.68               | Not found          |
| Huaceae sister to Malpighiales                        | Yes               | 32  | 39  | Yes   | 32  | <20 | Not found           | No         | 29                  | <20 | Not found           | NA                 | Not found               | Not found          |
| Malpighiales sister to Oxalidales                     | No                | <20 | <20 | No    | <20 | <20 | <50                 | No         | <20                 | <20 | <50                 | Not found          | Not found               | <50                |
| <b>Nitrogen-fixing clade (cf. APG II)</b>             | Yes               | 54  | 60  | Yes   | 54  | 70  | 100                 | Yes        | 54                  | 66  | <50                 | <50                | 68/1.0                  | (94)               |
| <b>Cucurbitales</b>                                   | Yes               | 98  | 100 | Yes   | 97  | 100 | <sup>[5]</sup> 100  | Clade      | 98                  | 100 | <sup>[5]</sup> 87   | <sup>[6]</sup> 100 | <sup>[7]</sup> 100/1.0  | <sup>[3]</sup> 100 |
| Anis'ceae sister to other Cuc'ales                    | Yes               | 29  | 29  | No    | 27  | 32  | 61                  | No         | 38                  | 43  | NA                  | NA                 | NA                      | NA                 |
| Anis'ceae+Cuc'ceae sister to other Cuc'ales           | No                | 33  | 56  | Yes   | <20 | 26  | Not found           | Yes        | 33                  | 40  | NA                  | NA                 | NA                      | NA                 |
| <b>Fagales</b>                                        | Yes               | 91  | 58  | Yes   | 91  | 64  | <sup>[4]</sup> 100  | Clade      | 92                  | 67  | <sup>[5]</sup> 94   | <sup>[6]</sup> 96  | <sup>[9]</sup> 100/1.0  | <sup>[4]</sup> 100 |
| <i>Nothofagus</i> sister to rem. Fagales              | Yes               | 86  | 58  | Yes   | 88  | 64  | NA                  | Yes        | 96                  | 67  | NA                  | NA                 | 100                     | NA                 |
| <b>Rosales</b>                                        | Yes               | 92  | 65  | Yes   | 90  | 67  | <sup>[9]</sup> 100  | Clade      | 93                  | 71  | <sup>[9]</sup> <50  | 98                 | <sup>[18]</sup> 100/1.0 | <sup>[8]</sup> 100 |
| Rosaceae sister to rem. Rosales                       | Yes               | 67  | 40  | No    | 74  | 54  | 100                 | Yes        | 73                  | 58  | 59                  | 88                 | /1.0                    | NA                 |
| Fagales sister to Cuc'ales                            | Yes               | 30  | 31  | No    | 36  | 24  | 100                 | No         | 38                  | 26  | <50                 | Not found          | 60/0.74                 | 85                 |
| Fagales sister to Rosales                             | No                | 28  | <20 | No    | 21  | <20 | Not found           | No         | <20                 | <20 | Not found           | Unresolved         | Not found               | Not found          |
| Rosales sister to Cuc'ales                            | No                | 28  | 23  | Yes   | 22  | 31  | Not found           | Yes        | 28                  | 34  | Not found           | Not found          | Not found               | Not found          |
| <b>Fabales</b>                                        | Yes               | 90  | 99  | Yes   | 90  | 92  | <sup>[9]</sup> 100  | Clade      | 86                  | 93  | <sup>[4]</sup> <50  | NA                 | <sup>[6]</sup> 98/1.0   | NA                 |
| <i>Quillaja</i> sister to rem. Fabales                | Yes               | 70  | 99  | Yes   | 66  | 91  | <50                 | Yes        | 86                  | 87  | NA                  | NA                 | NA                      | NA                 |
| Fabaceae forming clade                                | Yes               | 90  | 99  | Yes   | 88  | 92  | 100                 | Yes        | 77                  | 93  | <50                 | <sup>[4]</sup> 100 | <sup>[8]</sup> 80/1.0   | NA                 |
| Fabales sister to rem. N fixing                       | Yes               | 54  | 61  | Yes   | 57  | 74  | 99                  | Yes        | 70                  | 72  | <50                 | <50                | <50/0.78                | NA                 |
| <b>Zygophyllales</b>                                  | Yes               | 97  | 84  | Yes   | 91  | 90  | <sup>[3]</sup> 100  | Clade      | 99                  | 91  | <sup>[4]</sup> 76   | Singleton          | <sup>[2]</sup> 100/1.0  | Singleton          |
| <i>Krameria</i> sister to <b>Zygophyllaceae</b>       | Yes               | 90  | 84  | Yes   | 97  | 92  | 100                 | Yes        | 87                  | 91  | 81                  | NA                 | NA                      | NA                 |
| Zygophyllales sister to Celastrales                   | No                | <20 | <20 | No    | <20 | <20 | Not found           | No         | <20                 | <20 | Not found           | Not found          | Unresolved              | <50                |
| Zygophyllales sister to {CHMO + nitrogen-fixing}      | NA                | NA  | NA  | Yes   | 37  | 68  | 100                 | Yes        | <20/29 <sup>‡</sup> | 53  | Not found           | Not found          | Unresolved              | Not found          |

<sup>§</sup> Cor'ceae sister to Coryn'ceae in the majrle/LE50 consensus tree

<sup>†</sup> *Platium* not included in Malpighiales (see *Eurosid II* orders)

<sup>††</sup> Including/ excluding CelCe\_AY935740 ("Stackhousia monogyna"). Bipartions Cel'ceae (p.p.) & allies and CelCe\_AY935740 | all other taxa received CA-BS<sub>EUDIS</sub>=24 to 29.

<sup>#</sup> The relatively low GRTS-ML value reflects a sampling bias: One out of four Platanaceae sequences is mislabeled.

<sup>†††</sup> With respect to mislabeled/placed rbcL sequences (considered to represent not members of eurosids I (outtaxa)).

| Geraniales monophyletic                                 | NA                 | NA  | NA  | No         | <20 | <20 | <sup>[5]</sup> 100 | No     | 22                  | 22                  | NA                | Singleton          | <sup>[7]</sup> 80/1.0    | <sup>[2]</sup> (100) |
|---------------------------------------------------------|--------------------|-----|-----|------------|-----|-----|--------------------|--------|---------------------|---------------------|-------------------|--------------------|--------------------------|----------------------|
| Ger'ceae s.l. (cf. APG II)                              | NA                 | NA  | NA  | Clade      | 100 | 100 | 100                | Clade  | 100                 | 100                 | NA                | NA                 | <sup>[14]</sup> NA       | NA                   |
| Melia'ceae sister to Led.-Viv. clade ("Ger'ales 2")     | NA                 | NA  | NA  | Yes        | 44  | 63  | 100                | Yes    | 57                  | 99                  | NA                | NA                 | <sup>[14]</sup> <50/0.97 | <sup>[2]</sup> NA    |
| <b>Myrtales</b>                                         | NA                 | NA  | NA  | Yes        | 98  | 75  | <sup>[9]</sup> 100 | Clade  | 100                 | 72                  | <sup>[6]</sup> 90 | <sup>[2]</sup> 99  | <sup>[10]</sup> 100/1.0  | <sup>[3]</sup> 100   |
| COL clade sister to other Myrtales                      | NA                 | NA  | NA  | Yes        | 73  | 95  | 100                | Yes    | 65                  | 98                  | 60                | NA                 | 58/1.0                   | NA                   |
| Geraniales sister to Myrtales                           | NA                 | NA  | NA  | No         | <20 | <20 | 65                 | Partly | <20                 | <20                 | Not found         | Not found          | Not found                | <50                  |
| Eurosids 2 forming clade <sup>†††</sup>                 | Yes <sup>†††</sup> | NA  | NA  | Yes        | 49  | 35  | 100                | Yes    | <20/43 <sup>‡</sup> | <20/27 <sup>§</sup> | <50               | <50                | 95/1.0                   | 88                   |
| <b>Brassicales</b>                                      | Yes                | 92  | 92  | Yes        | 100 | 96  | <sup>[7]</sup> 100 | Clade  | 100                 | 94                  | 78                | <sup>[4]</sup> 100 | <sup>[14]</sup> 100/1.0  | <sup>[5]</sup> 100   |
| Akan.-Trop. clade sister to other Br'ales               | Yes                | 75  | 90  | Yes        | 76  | 81  | 54                 | Yes    | 68                  | 86                  | 100               | NA                 | <50/0.76                 | Not found            |
| <b>Huertales</b>                                        | Yes                | 81  | 100 | Yes        | 44  | 71  | Singleton          | Clade  | 50                  | 73                  | NA                | NA                 | Singleton                | Singleton            |
| Huertales + StaCs_AY646109 <sup>§</sup> clade           | NA                 | NA  | NA  | Yes        | 96  | NA  | NA                 | Yes    | 98                  | NA                  | NA                | NA                 | NA                       | NA                   |
| <b>Malvales</b>                                         | Yes                | 81  | 100 | Yes        | 86  | 69  | <sup>[6]</sup> 100 | Clade  | 92                  | 72                  | <50               | <sup>[5]</sup> 100 | <sup>[16]</sup> 100/1.0  | <sup>[7]</sup> 100   |
| Neuradaceae sister to remaining Malvales                | No                 | <20 | 39  | No         | <20 | <20 | 100                | No     | <20                 | <20                 | Not found         | NA                 | 67/1.0                   | Not found            |
| Bix.-Sphaer. clade sister to rem. Malvales              | No                 | 27  | 45  | Yes        | 26  | 64  | Not found          | Yes    | 41                  | 54                  | Not found         | NA                 | Not found                | Not found            |
| <b>Sapindales</b>                                       | Yes                | 98  | 100 | Yes        | 100 | 70  | <sup>[7]</sup> 100 | Clade  | 87                  | 64                  | <50               | <sup>[6]</sup> 100 | <sup>[13]</sup> 100/1.0  | <sup>[5]</sup> 100   |
| <i>Biebersteinia</i> sister to other Sapindaceae        | Yes                | 42  | <20 | No         | 40  | <20 | NA                 | No     | 24                  | <20                 | NA                | NA                 | NA                       | NA                   |
| NPT clade sister to { <i>Bieberst.</i> +other Sap'ales} | No                 | <20 | 84  | Yes        | <20 | 59  | NA                 | Yes    | <20                 | 61                  | NA                | NA                 | NA                       | NA                   |
| Malvales sister to Sapindales                           | Yes                | 77  | 100 | Yes        | 33  | 61  | Not found          | Yes    | 35                  | 37                  | <50               | Not found          | 51/1.0                   | 76                   |
| Malvales sister to Brassicales                          | No                 | <20 | <20 | No         | <20 | <20 | 98                 | No     | 22                  | <20                 | Not found         | 89                 | Not found                | Not found            |
| Huertales sister to other eurosids II                   | Yes                | 61  | 74  | Unresolved | <20 | 48  | Not found          | Yes    | <20                 | 30                  | NA                | NA                 | Unresolved               | <50                  |
| Huertales sister to {Brassicales + Sapindales}          | No                 | <20 |     |            |     |     |                    |        |                     |                     |                   |                    |                          |                      |
